# Supplementary material for: Efficacy and safety of high-voltage versus standard-voltage pulsed radiofrequency ablation for patients with neuropathic pain: protocol for a systematic review and meta-analysis
Source: PubMed Central journal article supplement — BMJ Open. 2022 Jul 8;12(7):e063385. doi: 10.1136/bmjopen-2022-063385 (PMC9272125; doi:10.1136/bmjopen-2022-063385), 2022-07-08
Supplement: bmjopen-2022-063385.draft_revisions.pdf [file bmjopen-2022-063385.draft_revisions.pdf]

# BMJ Open

BMJ Open is committed to open peer review. As part of this commitment we make the peer review history of every article we publish publicly available.

When an article is published we post the peer reviewers' comments and the authors' responses online. We also post the versions of the paper that were used during peer review. These are the versions that the peer review comments apply to.

The versions of the paper that follow are the versions that were submitted during the peer review process. They are not the versions of record or the final published versions. They should not be cited or distributed as the published version of this manuscript.

BMJ Open is an open access journal and the full, final, typeset and author-corrected version of record of the manuscript is available on our site with no access controls, subscription charges or pay-per-view fees (<http://bmjopen.bmj.com>).

If you have any questions on BMJ Open's open peer review process please email [info.bmjopen@bmj.com](mailto:info.bmjopen@bmj.com)

# BMJ Open

## **Efficacy and safety of high-voltage pulsed radiofrequency versus standard-voltage pulsed radiofrequency for patients with neuropathic pain: protocol for a systematic review and meta-analysis**

|                               |                                                                                                                                                                                                                                                                                                                                                                                                                                                                                                                                                   |
|-------------------------------|---------------------------------------------------------------------------------------------------------------------------------------------------------------------------------------------------------------------------------------------------------------------------------------------------------------------------------------------------------------------------------------------------------------------------------------------------------------------------------------------------------------------------------------------------|
| Journal:                      | <i>BMJ Open</i>                                                                                                                                                                                                                                                                                                                                                                                                                                                                                                                                   |
| Manuscript ID                 | bmjopen-2022-063385                                                                                                                                                                                                                                                                                                                                                                                                                                                                                                                               |
| Article Type:                 | Protocol                                                                                                                                                                                                                                                                                                                                                                                                                                                                                                                                          |
| Date Submitted by the Author: | 30-Mar-2022                                                                                                                                                                                                                                                                                                                                                                                                                                                                                                                                       |
| Complete List of Authors:     | Jia, Yitong; Xuanwu Hospital Capital Medical University, Anesthesiology<br>wang, zheng; Xuanwu Hospital Capital Medical University, Department of General Surgery<br>Ma, Yanhui; Xuanwu Hospital Capital Medical University, Anesthesiology<br>Wang, Tengting; Xuanwu Hospital Capital Medical University, Thoracic Surgery<br>Feng, Kunpeng; Xuanwu Hospital Capital Medical University, Anesthesiology<br>Feng, Guang; Xuanwu Hospital Capital Medical University, Anesthesiology<br>Wang, Tianlong; Xuanwu Hospital Capital Medical University |
| Keywords:                     | PAIN MANAGEMENT, Neurological pain < NEUROLOGY, Pain management < ANAESTHETICS                                                                                                                                                                                                                                                                                                                                                                                                                                                                    |
|                               |                                                                                                                                                                                                                                                                                                                                                                                                                                                                                                                                                   |

SCHOLARONE™  
Manuscripts

1 **Efficacy and safety of high-voltage pulsed**  
2 **radiofrequency versus standard-voltage pulsed**  
3 **radiofrequency for patients with neuropathic pain:**  
4 **protocol for a systematic review and meta-analysis**

5 <sup>1,2</sup>Yitong Jia, <sup>3</sup>Zheng Wang, <sup>1,2</sup>Yanhui Ma, <sup>4</sup>Tengteng Wang, <sup>1,2</sup>Kunpeng Feng, <sup>1,2</sup>Guang  
6 Feng <sup>1,2</sup>Tianlong Wang

7  
8 <sup>1</sup>Department of Anesthesiology, Xuanwu Hospital, Capital Medical University, Beijing,  
9 China.

10 <sup>2</sup>Beijing Municipal Geriatric Medical Research Center, Beijing, China.

11 <sup>3</sup>Department of General Surgery, Xuanwu Hospital, Capital Medical University, Beijing,  
12 China.

13 <sup>4</sup>Department of Thoracic surgery, Xuanwu Hospital, Capital Medical University, Beijing,  
14 China.

15  
16 Correspondence to

17 Prof Tianlong Wang, Department of Anesthesiology, Xuanwu Hospital, Capital  
18 Medical University, Beijing, China; E-mail: [w\\_tl5595@hotmail.com](mailto:w_tl5595@hotmail.com).

19  
20 Yitong Jia, Zheng Wang and Yanhui Ma contributed equally to this paper.

21  
22 **Abstract**

23 **Introduction** Pulsed radiofrequency (PRF) is commonly used for the treatment of  
24 neuropathic pain (NP). However, whether increasing the output voltage of PRF can safely  
25 improve the efficacy of PRF treatment remains unclear. This study aims to compare the  
26 efficacy and safety of high-voltage PRF and standard-voltage PRF for the treatment of  
27 patients with NP.

1  
2  
3  
4  
5 28  
6 29 **Methods and analysis** We will search PubMed/MEDLINE, EMBASE, Web of Science,  
7 30 and the Cochrane Library (from the date of inception until March 15, 2022), etc. Only  
8 31 randomized controlled trials (RCTs) will be included. Two reviewers (YJ and GF) will  
9 32 independently complete the study screening and selection, data extraction, risk of bias  
10 33 assessment, and quality of evidence assessment. The primary outcome of this meta-  
11 34 analysis will be the efficiency rate in patients with NP. The secondary outcomes will  
12 35 include numeric rating scale (NRS), visual analog scale (VAS) score, time to take effect,  
13 36 rescue drug dosage, quality of life (QoL) using the health questionnaire (SF-36), and the  
14 37 incidence of adverse events (AEs). Meta-analyses will be conducted using standard meta-  
15 38 analysis software (RevMan V.5.3, The Nordic Cochrane Center, The Cochrane  
16 39 Collaboration, Copenhagen, Denmark).

17 40  
18 41 **Ethics and dissemination** Ethical approval was waived as our systematic review will be  
19 42 based on published literature. The results of this study will be submitted to a peer-  
20 43 reviewed journal.

21 44  
22  
23  
24  
25  
26  
27  
28 45 **PROSPERO registration number** CRD42022297804.

### 29 46 30 47 **Strengths and limitations of this study**

31 48 To our knowledge, this will be the first systematic review and meta-analysis to evaluate  
32 49 the efficacy and safety of high-voltage PRF for the treatment of patients with NP.

33 50 Only randomized controlled trials will be included in our study to provide unbiased  
34 51 information than other study designs

35 52 This study findings will provide comprehensive information for future study designs in  
36 53 terms of interventional treatment of neuropathic pain.

37 54 The accuracy of the conclusions of our research may be subjected to language limitations  
38 55 for only English published studies will be included.

39 56  
40 57 **Key words:** high-voltage, pulsed radiofrequency, neuropathic pain, randomized  
41 58 controlled trials

## 42 59 43 44 45 46 47 48 49 50 60 **Introduction**

51 61 Neuropathic pain (NP) is a common chronic pain condition caused by lesions or diseases  
52 62 affecting the somatosensory nervous system, including trigeminal neuralgia, peripheral  
53 63 nerve injury pain, painful polyneuropathy, postherpetic neuralgia, central poststroke pain

1  
2  
3  
4  
5 64 and so on.<sup>1</sup> Epidemiological data have reported that the global prevalence of NP is  
6  
7 65 approximately 6.9% - 10%.<sup>2</sup> NP is a refractory pain syndrome with a long duration of  
8  
9 66 occurrence, frequent recurrent attacks, and poor response to traditional analgesics. Most  
10  
11 67 patients with NP suffer from ongoing or intermittent spontaneous pain with burning,  
12  
13 68 pricking, and a squeezing sensation with poor quality of life (QoL).<sup>3</sup> Therefore, finding  
14  
15 69 an effective treatment option for NP and improving patients' QoL is of great importance.  
16  
17  
18 70 In recent years, pulsed radiofrequency (PRF), a new type of neuromodulation technique,  
19  
20  
21 71 has been successfully applied in the treatment of NP.<sup>4-9</sup> Different from continuous  
22  
23 72 radiofrequency (CRF), which produces heat by friction and vibration, leading to  
24  
25 73 thermocoagulation, denaturation, and necrosis of the target tissue, PRF provides pulsed  
26  
27 74 energy waves followed by a 480 ms heat dissipation interval, and the temperature does  
28  
29 75 not exceed 42°C.<sup>10 11</sup> The mechanism of PRF treatment is via the modulation of nerve  
30  
31 76 function caused by the electric field effect rather than blocking pain signal transduction.<sup>12</sup>  
32  
33  
34 77 <sup>13</sup> Thus, PRF is a nondestructive technique that can be repeatedly applied without damage  
35  
36 78 to nerve tissue.<sup>11</sup>  
37  
38  
39 79 The standard proposed PRF parameters were set as an output voltage of 45 V, temperature  
40  
41 80 of 42 °C, pulse frequency of 2 Hz, output frequency of 500 kHz, continuous current action  
42  
43 81 of 20 ms, and intermission period of 480 ms. Recently, scholars have attempted to treat  
44  
45 82 NP patients with high-voltage PRF. Teixeira and Sluijter first reported that high voltage  
46  
47 83 PRF of 60 V on discogenic pain patients attained satisfactory efficacy over 3 months.<sup>14</sup>  
48  
49  
50 84 In 2013, Luo et al found that the postoperative numeric rating scale (NRS) was  
51  
52  
53  
54  
55  
56  
57  
58  
59  
60

1  
2  
3  
4  
5 85 significantly negatively correlated with the output voltage of PRF.<sup>15</sup> Moreover, Luo et al  
6  
7  
8 86 also compared the efficacy of high voltage PRF and standard voltage PRF for refractory  
9  
10  
11 87 neuralgia infraorbital nerve therapy, and results revealed that high voltage PRF could  
12  
13 88 achieve higher response rates at month 1, 3 months, 6 months, and one year post-  
14  
15 89 procedure.<sup>16</sup> However, more patients in the high-voltage group (27%) experienced mild  
16  
17  
18 90 numbness postoperatively than in the standard-voltage group (13%). In addition, a  
19  
20  
21 91 randomized controlled trial (RCT) conducted by Wan et al showed that the scores were  
22  
23 92 significantly lower in the high-voltage group than in the standard-voltage group at 3 and  
24  
25  
26 93 6 months, but with no significant difference was observed at one month after treatment.<sup>17</sup>  
27  
28  
29 94 In addition, Wan et al 's results revealed that the incidence of ecchymoses in the high-  
30  
31 95 voltage group (19.2%) was higher than that in the standard-voltage group (12.1%). As a  
32  
33  
34 96 result, whether the efficacy of high-voltage PRF at different time points is superior to that  
35  
36 97 of standard-voltage PRF, and whether high-voltage PRF is a safe treatment method  
37  
38  
39 98 requires further analysis.

40  
41 99 The primary objectives of this study will be to compare the efficacy and safety of high-  
42  
43  
44 100 voltage PRF and standard-voltage PRF for the treatment of NP at different time points  
45  
46  
47 101 postoperatively through a systematic review and meta-analysis of RCTs.  
48

49 102

## 51 103 **Methods**

52  
53  
54 104 This protocol was developed according to the reporting guidelines of the Preferred  
55  
56  
57 105 Reporting Items for Systematic Reviews and Meta-Analyses Protocols (PRISMA-P)  
58  
59  
60

1  
2  
3  
4  
5 106 statement<sup>18</sup> (**checklist in Supplement 1**). The protocol for this systematic review was  
6  
7 107 registered in the PROSPERO database (registration number: CRD42022297804). Our  
8  
9  
10 108 systematic review will be conducted in accordance with the recommendations of the  
11  
12  
13 109 Cochrane Handbook for Systematic Reviews of Interventions.<sup>19</sup> Any amendments made  
14  
15 110 to this protocol and the whole review process will be updated in a timely manner on the  
16  
17  
18 111 PROSPERO registration and the final manuscript.  
19  
20  
21 112

## 23 113 **Criteria for considering studies for this review**

### 26 114 **Types of studies**

28 115 Only RCTs will be included. All studies must be published in English. Experimental  
29  
30  
31 116 animal studies will be excluded.  
32  
33  
34 117

### 36 118 **Participants**

38 119 Patients with NP conditions recognized and defined by the International Association for  
39  
40  
41 120 the Study of Pain (IASP)<sup>20</sup> will be included. NP is initiated or caused by a primary lesion  
42  
43  
44 121 or dysfunction of the nervous system. Studies regarding diabetic neuropathy, complex  
45  
46  
47 122 regional pain syndrome type I, low back pain without radicular pain, and postsurgical  
48  
49 123 pain will be excluded.  
50  
51  
52 124

### 54 125 **Interventions and Comparators**

56  
57 126 We will examine trials investigating high voltage PRF treatment for patients with NP.  
58  
59  
60

1  
2  
3  
4  
5 127 The high voltage PRF treatment mode will be set as a manual pulse mode: the initial  
6  
7  
8 128 voltage was 40 or 45 V, and the output voltage will then be gradually increased to the  
9  
10 129 highest voltage the patient can tolerate (temperature control below 50 °C). The  
11  
12  
13 130 comparator will be the standard PRF treatment.

14  
15 131

### 16 17 18 132 **Outcome measures**

19  
20 133 The primary outcome of this meta-analysis is the efficiency rate in patients with NP. The  
21  
22  
23 134 predefined time points for the efficiency rate will be 1 month, 3 months and 6 months  
24  
25  
26 135 after the procedure. Other time points, such as 1-year or 2-years, will also be considered.  
27  
28 136 Treatment efficiency recurrence is defined as a pain reduction of greater than 50% after  
29  
30  
31 137 treatment compared to pre-surgery. Secondary outcomes will include (NRS) or visual  
32  
33  
34 138 analog scale (VAS) score, time to take effect, rescue drug dosage, and quality of life (QoL)  
35  
36 139 using the health questionnaire (SF-36)<sup>21</sup> at 1 month, 3 months, and 6 months  
37  
38  
39 140 postoperatively, and incidence of adverse events (AEs).

40  
41 141

### 42 43 44 142 **Information sources and search strategy**

45  
46 143 A computer-based search strategy will be designed by an experienced librarian and  
47  
48  
49 144 revised by another expert librarian according to the Peer Review of Electronic Search  
50  
51  
52 145 Strategies checklist.<sup>22</sup> The primary source of literature will be the following major  
53  
54  
55 146 electronic databases: PubMed/MEDLINE, EMBASE, Web of Science, and the Cochrane  
56  
57 147 Library (from the date of inception until March 15, 2022). The secondary source of  
58  
59  
60



1  
2  
3  
4  
5 148 potentially relevant research includes conference proceedings for relevant abstracts,  
6  
7  
8 149 clinical trials registers (ClinicalTrials.gov), and the World Health Organization's  
9  
10 150 International Clinical Trial Registry Platform (WHO ICTRP) to identify ongoing studies.  
11  
12  
13 151 The search will encompass a broad range of terms and keywords related to "high-voltage,"  
14  
15 152 "pulsed radiofrequency," "neuropathic pain", and "RCT". The detailed search strategy is  
16  
17  
18 153 presented in **Supplement 2**.

19  
20  
21 154

## 22 23 155 **Data selection and analysis**

### 24 25 156 **Study Selection**

26  
27  
28 157 The Population, Intervention, Comparison, Outcome (PICO) model<sup>23</sup> will be used to  
29  
30  
31 158 determine the specific criteria for selecting studies. Two reviewers (YJ and GF) will  
32  
33  
34 159 independently screen and select the relevant studies. In the initial screening, reviewers  
35  
36 160 will determine whether the study could be included by screening the titles and abstracts  
37  
38  
39 161 retrieved via database searches. The full texts retained from the initial selection of articles  
40  
41 162 will be screened to include studies that meet the eligibility criteria. Disagreements  
42  
43  
44 163 between the two reviewers will be resolved by a third reviewer (TW). If several studies  
45  
46 164 present data from the same study population or multiple publications from the same study  
47  
48  
49 165 are published in chronological order, the study with the most direct interventions or the  
50  
51  
52 166 largest sample size will be reserved. The same methods will be used for citation, reference  
53  
54 167 screening, and selection, as well as for protocols registered in clinical trial registries.

55  
56  
57 168  
58  
59  
60

## 169 **Data extraction**

170 A standardized electronic form for data extraction will be created by ZW. Two reviewers  
171 (YJ and GF) will independently extract the following data: study characteristics (e.g.,  
172 name of the first author, year of publication, type of study, sample size), population  
173 characteristics (e.g., age, gender, disease duration, medical history, preoperative pain  
174 intensity, and follow-up period), and outcome data (e.g., primary and secondary outcomes  
175 and any AEs caused by PRF treatment). Similarly, a third reviewer will be required to  
176 resolve any discrepancies. We will attempt to contact the study authors by email or post  
177 for further information in case of any ambiguity or insufficient information.

178

## 179 **Assessment of risk of bias and quality of evidence assessment**

180 Two reviewers (YJ and GF) will independently assess risk of bias (RoB) and  
181 discrepancies will be resolved by a third reviewer (ZW). The RoB of RCTs will be  
182 assessed according to items in the Cochrane Collaboration's tool.<sup>19</sup>

183 We will evaluate the overall quality of a body of evidence in accordance with the Grading  
184 of Recommendations Assessment, Development, and Evaluation (GRADE)  
185 methodology<sup>24</sup> which examines study design, RoB, inconsistency, indirectness, and  
186 imprecision. According to the GRADE, quality of evidence will be rated as high,  
187 moderate, low, or very low.

188

## 189 **Data synthesis and analysis**

1  
2  
3  
4  
5 190 Meta-analyses will be conducted using the standard meta-analysis software (RevMan  
6  
7  
8 191 V.5.3, The Nordic Cochrane Center, The Cochrane Collaboration, Copenhagen,  
9  
10 192 Denmark). We will compute standardized mean differences (SMDs) and 95% confidence  
11  
12  
13 193 intervals (CIs) for continuous outcomes, and risk ratios (RR) with 95% CI for binary  
14  
15 194 outcomes. A two-tailed P value of less than 0.05 is considered statistically significant. We  
16  
17  
18 195 will assess the intervention effects between high-voltage PRF and standard-voltage PRF  
19  
20 196 using pre- to post-intervention changes. When the data in the literature are expressed as  
21  
22  
23 197 medians and quartiles, we will use mathematical operations to transform them into mean  
24  
25 198 and standard deviation (SD).<sup>25 26</sup> We will use forest plots to visualize pooled estimates  
26  
27  
28 199 and the extent of heterogeneity among studies. Heterogeneity will be assessed using the  
29  
30 200  $I^2$  statistic.  $I^2 > 50\%$  will indicate substantial heterogeneity, and the random-effects model  
31  
32  
33 201 will be used to analyze the outcomes; otherwise, a fixed-effect model will be applied.  
34  
35  
36 202 When heterogeneity is found, we will perform subgroup analysis according to  
37  
38 203 prespecified variables, such as study design, intervention characteristics, or risk of bias.  
39  
40  
41 204 The sources of heterogeneity will be explored using sensitivity analysis. A funnel plot<sup>27</sup>  
42  
43  
44 205 or Egger test<sup>28</sup> will be used to assess publication bias.  
45  
46  
47 206

## 49 207 **Patient and Public Involvement**

51 208 As our study is a systematic review based on published literature, no patients will be  
52  
53  
54 209 involved in this study.  
55  
56  
57 210

## 211 **Discussion**

212 Several studies have evaluated the efficacy of high voltage PRF in the treatment of NP.  
213 Li et al <sup>29</sup> and Wan et al <sup>17</sup> conducted RCTs and reported that the VAS score declined  
214 significantly from the baseline levels in both groups. Moreover, the VAS score in the  
215 high-voltage PRF group was significantly lower than that in the standard-voltage PRF  
216 group at some time points but not at all follow-up periods. The eight dimensions of the  
217 SF-36 scores used to assess QoL between the two groups still require detailed assessment.  
218 To date, the incidence of AEs associated with high-voltage PRF and standard-voltage  
219 PRF group is not clear. Therefore, it is important for physicians to accumulate more high-  
220 level evidence regarding the efficacy and safety of different PRF output voltages for NP  
221 patients' therapy.

222 The objective of our study is to compare the efficacy and safety of high-voltage PRF and  
223 standard-voltage PRF for NP therapy and provide clinical evidence for the choice of PRF  
224 modes in clinical practice via synthesizing the existing literature. However, this study has  
225 some limitations. The sample size of the eligible RCTs was not large and the accuracy of  
226 the conclusions of our research may be biased due to language limitations, as we will only  
227 include studies published in English. Overall, the study findings will provide  
228 comprehensive information for future study designs in terms of interventional treatment  
229 of NP.

## 230 **Abbreviations**

231 PRF, Pulsed radiofrequency; NP, neuropathic pain; RCTs, randomized controlled trials;

1  
2  
3  
4  
5 232 NRS, numeric rating scale; VAS, visual analog scale; QoL, quality of life; AEs, adverse  
6  
7  
8 233 events; RoB, risk of bias; GRADE, Grading of Recommendations Assessment,  
9  
10 234 Development, and Evaluation; SMDs, standardized mean differences; CIs, confidence  
11  
12  
13 235 intervals; RR, risk ratios.

## 236 **Ethics and dissemination**

17  
18 237 Ethical approval was waived as our systematic review will be based on published  
19  
20  
21 238 literature. The results of this study will be submitted to a peer-reviewed journal.

22  
23  
24 239  
240 **Acknowledgments** The authors would like to thank the participants of the study for their cooperation.

25  
26 241  
26 242 **Contributors** YJ, ZW, TW and TW made substantial contributions to clinical study design; YJ, YM  
27  
28 243 and GF made substantial contributions to manuscript preparation, editing and review; KF made  
29  
30 244 contributions to English language editing; YM, KF and GF consulted about clinical issues; YJ, YM,  
31  
32 245 TW and TW have given final approval of the version to be published. YJ, ZW and YM contributed  
33  
34 246 equally to this work. TW is responsible as corresponding author.

35  
36 247  
35 248 **Funding** This study was funded and sponsored by Beijing Municipal Medical Science Institute-Public  
36  
37 249 Welfare Development Reform Pilot Project (Capital Medical Research No. 2019-2).

40  
41  
42  
43  
44  
45  
46  
47  
48  
49  
50  
51  
52  
53  
54  
55  
56  
57  
58  
59  
60

250  
251 **Consent for publication** All authors consented.

252

253 **Conflicts of interest** None.

254

## 255 **References**

- 256 1. Baron R, Binder A, Wasner G. Neuropathic pain: diagnosis, pathophysiological mechanisms, and  
257 treatment. *The Lancet Neurology* 2010;9(8):807-19. doi: 10.1016/s1474-4422(10)70143-5  
258 [published Online First: 2010/07/24]  
259 2. van Hecke O, Austin SK, Khan RA, et al. Neuropathic pain in the general population: a systematic  
60

- 1  
2  
3  
4  
5 260 review of epidemiological studies. *Pain* 2014;155(4):654-62. doi:  
6 261 10.1016/j.pain.2013.11.013 [published Online First: 2013/12/03]  
7 262 3. Colloca L, Ludman T, Bouhassira D, et al. Neuropathic pain. *Nature reviews Disease primers*  
8 263 2017;3:17002. doi: 10.1038/nrdp.2017.2 [published Online First: 2017/02/17]  
9 264 4. Park CH, Lee SH, Lee PB. Intradiscal Pulsed Radiofrequency Application Duration Effect on  
10 265 Lumbar Discogenic Low Back Pain. *Pain physician* 2020;23(5):E535-e40. [published Online  
11 266 First: 2020/09/25]  
12 267 5. Martin DC, Willis ML, Mullinax LA, et al. Pulsed radiofrequency application in the treatment of  
13 268 chronic pain. *Pain practice : the official journal of World Institute of Pain* 2007;7(1):31-5.  
14 269 doi: 10.1111/j.1533-2500.2007.00107.x [published Online First: 2007/02/20]  
15 270 6. Kim K, Jo D, Kim E. Pulsed Radiofrequency to the Dorsal Root Ganglion in Acute Herpes Zoster  
16 271 and Postherpetic Neuralgia. *Pain physician* 2017;20(3):E411-e18. [published Online First:  
17 272 2017/03/25]  
18 273 7. Shi Y, Wu W. Treatment of Neuropathic Pain Using Pulsed Radiofrequency: A Meta-analysis. *Pain*  
19 274 *physician* 2016;19(7):429-44. [published Online First: 2016/09/28]  
20 275 8. Jia Y, Shrestha N, Wang X, et al. The Long-Term Outcome of CT-Guided Pulsed Radiofrequency  
21 276 in the Treatment of Idiopathic Glossopharyngeal Neuralgia: A Retrospective Multi-Center  
22 277 Case Series. *Journal of pain research* 2020;13:2093-102. doi: 10.2147/jpr.S259994  
23 278 [published Online First: 2020/09/10]  
24 279 9. Vuka I, Marciuš T, Došenović S, et al. Efficacy and Safety of Pulsed Radiofrequency as a Method  
25 280 of Dorsal Root Ganglia Stimulation in Patients with Neuropathic Pain: A Systematic Review.  
26 281 *Pain medicine (Malden, Mass)* 2020;21(12):3320-43. doi: 10.1093/pm/pnaa141 [published  
27 282 Online First: 2020/06/04]  
28 283 10. Wu CY, Lin HC, Chen SF, et al. Efficacy of Pulsed Radiofrequency in Herpetic Neuralgia: A  
29 284 Meta-Analysis of Randomized Controlled Trials. *The Clinical journal of pain*  
30 285 2020;36(11):887-95. doi: 10.1097/ajp.0000000000000867 [published Online First:  
31 286 2020/07/24]  
32 287 11. Wu H, Zhou J, Chen J, et al. Therapeutic efficacy and safety of radiofrequency ablation for the  
33 288 treatment of trigeminal neuralgia: a systematic review and meta-analysis. *Journal of pain*  
34 289 *research* 2019;12:423-41. doi: 10.2147/jpr.S176960 [published Online First: 2019/01/31]  
35 290 12. Sam J, Catapano M, Sahni S, et al. Pulsed Radiofrequency in Interventional Pain Management:  
36 291 Cellular and Molecular Mechanisms of Action - An Update and Review. *Pain physician*  
37 292 2021;24(8):525-32. [published Online First: 2021/11/19]  
38 293 13. Vanneste T, Van Lantschoot A, Van Boxem K, et al. Pulsed radiofrequency in chronic pain.  
39 294 *Current opinion in anaesthesiology* 2017;30(5):577-82. doi:  
40 295 10.1097/aco.0000000000000502 [published Online First: 2017/07/13]  
41 296 14. Teixeira A, Sluijter ME. Intradiscal high-voltage, long-duration pulsed radiofrequency for  
42 297 discogenic pain: a preliminary report. *Pain medicine (Malden, Mass)* 2006;7(5):424-8. doi:  
43 298 10.1111/j.1526-4637.2006.00138.x [published Online First: 2006/10/04]  
44 299 15. Luo F, Meng L, Wang T, et al. Pulsed radiofrequency treatment for idiopathic trigeminal neuralgia:  
45 300 a retrospective analysis of the causes for ineffective pain relief. *European journal of pain*  
46 301 *(London, England)* 2013;17(8):1189-92. doi: 10.1002/j.1532-2149.2012.00278.x [published  
47 302 Online First: 2013/01/17]

- 1  
2  
3  
4 303 16. Luo F, Wang T, Shen Y, et al. High Voltage Pulsed Radiofrequency for the Treatment of  
5 304 Refractory Neuralgia of the Infraorbital Nerve: A Prospective Double-Blinded Randomized  
6 305 Controlled Study. *Pain physician* 2017;20(4):271-79. [published Online First: 2017/05/24]  
7  
8 306 17. Wan CF, Song T. Comparison of Two Different Pulsed Radiofrequency Modes for Prevention of  
9 307 Postherpetic Neuralgia in Elderly Patients with Acute/Subacute Trigeminal Herpes Zoster.  
10 308 *Neuromodulation : journal of the International Neuromodulation Society* 2021 doi:  
11 309 10.1111/ner.13457 [published Online First: 2021/05/20]  
12  
13 310 18. Bendixen M, Jørgensen OD, Kronborg C, et al. Postoperative pain and quality of life after  
14 311 lobectomy via video-assisted thoracoscopic surgery or anterolateral thoracotomy for early  
15 312 stage lung cancer: a randomised controlled trial. *The Lancet Oncology* 2016;17(6):836-44.  
16 313 doi: 10.1016/s1470-2045(16)00173-x [published Online First: 2016/05/11]  
17  
18 314 19. Cumpston M, Li T, Page MJ, et al. Updated guidance for trusted systematic reviews: a new edition  
19 315 of the Cochrane Handbook for Systematic Reviews of Interventions. *The Cochrane database*  
20 316 *of systematic reviews* 2019;10:Ed000142. doi: 10.1002/14651858.Ed000142 [published  
21 317 Online First: 2019/10/24]  
22  
23 318 20. Ochoa JL. Neuropathic pain: redefinition and a grading system for clinical and research purposes.  
24 319 *Neurology* 2009;72(14):1282-3. doi: 10.1212/01.wnl.0000346325.50431.5f [published  
25 320 Online First: 2009/04/08]  
26  
27 321 21. Brazier JE, Harper R, Jones NM, et al. Validating the SF-36 health survey questionnaire: new  
28 322 outcome measure for primary care. *BMJ (Clinical research ed)* 1992;305(6846):160-4. doi:  
29 323 10.1136/bmj.305.6846.160 [published Online First: 1992/07/18]  
30  
31 324 22. McGowan J, Sampson M, Salzwedel DM, et al. PRESS Peer Review of Electronic Search  
32 325 Strategies: 2015 Guideline Statement. *Journal of clinical epidemiology* 2016;75:40-6. doi:  
33 326 10.1016/j.jclinepi.2016.01.021 [published Online First: 2016/03/24]  
34  
35 327 23. Huang X, Lin J, Demner-Fushman D. Evaluation of PICO as a knowledge representation for  
36 328 clinical questions. *AMIA Annual Symposium proceedings AMIA Symposium*  
37 329 2006;2006:359-63. [published Online First: 2007/01/24]  
38  
39 330 24. Guyatt G, Oxman AD, Akl EA, et al. GRADE guidelines: 1. Introduction-GRADE evidence  
40 331 profiles and summary of findings tables. *Journal of clinical epidemiology* 2011;64(4):383-  
41 332 94. doi: 10.1016/j.jclinepi.2010.04.026 [published Online First: 2011/01/05]  
42  
43 333 25. Wan X, Wang W, Liu J, et al. Estimating the sample mean and standard deviation from the sample  
44 334 size, median, range and/or interquartile range. *BMC Med Res Methodol* 2014;14:135. doi:  
45 335 10.1186/1471-2288-14-135 [published Online First: 20141219]  
46  
47 336 26. Shi J, Luo D, Wan X, et al. Detecting the skewness of data from the sample size and the five-  
48 337 number summary. 2020  
49  
50 338 27. Egger M, Davey Smith G, Schneider M, et al. Bias in meta-analysis detected by a simple, graphical  
51 339 test. *BMJ (Clinical research ed)* 1997;315(7109):629-34. doi: 10.1136/bmj.315.7109.629  
52 340 [published Online First: 1997/10/06]  
53  
54 341 28. Sterne JA, Sutton AJ, Ioannidis JP, et al. Recommendations for examining and interpreting funnel  
55 342 plot asymmetry in meta-analyses of randomised controlled trials. *BMJ (Clinical research ed)*  
56 343 2011;343:d4002. doi: 10.1136/bmj.d4002 [published Online First: 2011/07/26]  
57  
58 344 29. Li H, Ding Y, Zhu Y, et al. Effective Treatment of Postherpetic Neuralgia at the First Branch of  
59 345 the Trigeminal Nerve by High-Voltage Pulsed Radiofrequency. *Frontiers in neurology*

1  
2  
3  
4  
5  
6  
7  
8  
9  
10  
11  
12  
13  
14  
15  
16  
17  
18  
19  
20  
21  
22  
23  
24  
25  
26  
27  
28  
29  
30  
31  
32  
33  
34  
35  
36  
37  
38  
39  
40  
41  
42  
43  
44  
45  
46  
47  
48  
49  
50  
51  
52  
53  
54  
55  
56  
57  
58  
59  
60

346  
347

2021;12:746035. doi: 10.3389/fneur.2021.746035 [published Online First: 2021/10/29]

For peer review only



**Supplement 1.** PRISMA-P (Preferred Reporting Items for Systematic review and Meta-Analysis Protocols) 2015 checklist: recommended items to address in a systematic review protocol\*

| Section and topic                 | Item No | Checklist item                                                                                                                                                                                  | Check results |
|-----------------------------------|---------|-------------------------------------------------------------------------------------------------------------------------------------------------------------------------------------------------|---------------|
| <b>ADMINISTRATIVE INFORMATION</b> |         |                                                                                                                                                                                                 |               |
| Title:                            |         |                                                                                                                                                                                                 |               |
| Identification                    | 1a      | Identify the report as a protocol of a systematic review                                                                                                                                        | Yes           |
| Update                            | 1b      | If the protocol is for an update of a previous systematic review, identify as such                                                                                                              | Yes           |
| Registration                      | 2       | If registered, provide the name of the registry (such as PROSPERO) and registration number                                                                                                      | Yes           |
| Authors:                          |         |                                                                                                                                                                                                 |               |
| Contact                           | 3a      | Provide name, institutional affiliation, e-mail address of all protocol authors; provide physical mailing address of corresponding author                                                       | Yes           |
| Contributions                     | 3b      | Describe contributions of protocol authors and identify the guarantor of the review                                                                                                             | Yes           |
| Amendments                        | 4       | If the protocol represents an amendment of a previously completed or published protocol, identify as such and list changes; otherwise, state plan for documenting important protocol amendments | Yes           |
| Support:                          |         |                                                                                                                                                                                                 |               |
| Sources                           | 5a      | Indicate sources of financial or other support for the review                                                                                                                                   | Yes           |
| Sponsor                           | 5b      | Provide name for the review funder and/or sponsor                                                                                                                                               | Yes           |
| Role of sponsor or funder         | 5c      | Describe roles of funder(s), sponsor(s), and/or institution(s), if any, in developing the protocol                                                                                              | Yes           |

---

**INTRODUCTION**


---

|            |   |                                                                                                                                                          |     |
|------------|---|----------------------------------------------------------------------------------------------------------------------------------------------------------|-----|
| Rationale  | 6 | Describe the rationale for the review in the context of what is already known                                                                            | Yes |
| Objectives | 7 | Provide an explicit statement of the question(s) the review will address with reference to participants, interventions, comparators, and outcomes (PICO) | Yes |

---

**METHODS**


---

|                      |    |                                                                                                                                                                                                                               |     |
|----------------------|----|-------------------------------------------------------------------------------------------------------------------------------------------------------------------------------------------------------------------------------|-----|
| Eligibility criteria | 8  | Specify the study characteristics (such as PICO, study design, setting, time frame) and report characteristics (such as years considered, language, publication status) to be used as criteria for eligibility for the review | Yes |
| Information sources  | 9  | Describe all intended information sources (such as electronic databases, contact with study authors, trial registers or other grey literature sources) with planned dates of coverage                                         | Yes |
| Search strategy      | 10 | Present draft of search strategy to be used for at least one electronic database, including planned limits, such that it could be repeated                                                                                    | Yes |

---

## Study records:

|                             |     |                                                                                                                                                                                                 |     |
|-----------------------------|-----|-------------------------------------------------------------------------------------------------------------------------------------------------------------------------------------------------|-----|
| Data management             | 11a | Describe the mechanism(s) that will be used to manage records and data throughout the review                                                                                                    | Yes |
| Selection process           | 11b | State the process that will be used for selecting studies (such as two independent reviewers) through each phase of the review (that is, screening, eligibility and inclusion in meta-analysis) | Yes |
| Data collection process     | 11c | Describe planned method of extracting data from reports (such as piloting forms, done independently, in duplicate), any processes for obtaining and confirming data from investigators          | Yes |
| Data items                  | 12  | List and define all variables for which data will be sought (such as PICO items, funding sources), any pre-planned data assumptions and simplifications                                         | Yes |
| Outcomes and prioritization | 13  | List and define all outcomes for which data will be sought, including prioritization of main and additional outcomes, with rationale                                                            | Yes |

---

|                                    |     |                                                                                                                                                                                                                                                  |     |
|------------------------------------|-----|--------------------------------------------------------------------------------------------------------------------------------------------------------------------------------------------------------------------------------------------------|-----|
| Risk of bias in individual studies | 14  | Describe anticipated methods for assessing risk of bias of individual studies, including whether this will be done at the outcome or study level, or both; state how this information will be used in data synthesis                             | Yes |
| Data synthesis                     | 15a | Describe criteria under which study data will be quantitatively synthesized                                                                                                                                                                      | Yes |
|                                    | 15b | If data are appropriate for quantitative synthesis, describe planned summary measures, methods of handling data and methods of combining data from studies, including any planned exploration of consistency (such as $I^2$ , Kendall's $\tau$ ) | Yes |
|                                    | 15c | Describe any proposed additional analyses (such as sensitivity or subgroup analyses, meta-regression)                                                                                                                                            | Yes |
|                                    | 15d | If quantitative synthesis is not appropriate, describe the type of summary planned                                                                                                                                                               | Yes |
| Meta-bias(es)                      | 16  | Specify any planned assessment of meta-bias(es) (such as publication bias across studies, selective reporting within studies)                                                                                                                    | Yes |
| Confidence in cumulative evidence  | 17  | Describe how the strength of the body of evidence will be assessed (such as GRADE)                                                                                                                                                               | Yes |

**\* It is strongly recommended that this checklist be read in conjunction with the PRISMA-P Explanation and Elaboration (cite when available) for important clarification on the items. Amendments to a review protocol should be tracked and dated. The copyright for PRISMA-P (including checklist) is held by the PRISMA-P Group and is distributed under a Creative Commons Attribution Licence 4.0.**

*From: Shamseer L, Moher D, Clarke M, Ghersi D, Liberati A, Petticrew M, Shekelle P, Stewart L, PRISMA-P Group. Preferred reporting items for systematic review and meta-analysis protocols (PRISMA-P) 2015: elaboration and explanation. BMJ. 2015 Jan 2;349(jan02 1):g7647.*

| Search step | Search terms                                                                                                                                                                                                                                                                                                                                                                                                                                                                                                                                                                                                                                                                                                                                                                                                                                                                                                                                                                                                                                                                                                                                                                                                                                                                                                                                                                                                                                                                                                                                                                                                                                                                                                                                                                                                                                                                                                                                                                                                                                                                                                                                                                                                                                                                                                                                                                                                                                                                                                                                                                                                                                                                                                                                                                                                                                                                                                                                                                                                                                                                                                             |
|-------------|--------------------------------------------------------------------------------------------------------------------------------------------------------------------------------------------------------------------------------------------------------------------------------------------------------------------------------------------------------------------------------------------------------------------------------------------------------------------------------------------------------------------------------------------------------------------------------------------------------------------------------------------------------------------------------------------------------------------------------------------------------------------------------------------------------------------------------------------------------------------------------------------------------------------------------------------------------------------------------------------------------------------------------------------------------------------------------------------------------------------------------------------------------------------------------------------------------------------------------------------------------------------------------------------------------------------------------------------------------------------------------------------------------------------------------------------------------------------------------------------------------------------------------------------------------------------------------------------------------------------------------------------------------------------------------------------------------------------------------------------------------------------------------------------------------------------------------------------------------------------------------------------------------------------------------------------------------------------------------------------------------------------------------------------------------------------------------------------------------------------------------------------------------------------------------------------------------------------------------------------------------------------------------------------------------------------------------------------------------------------------------------------------------------------------------------------------------------------------------------------------------------------------------------------------------------------------------------------------------------------------------------------------------------------------------------------------------------------------------------------------------------------------------------------------------------------------------------------------------------------------------------------------------------------------------------------------------------------------------------------------------------------------------------------------------------------------------------------------------------------------|
| #1          | <p>"neuralgia"[MeSH Terms] OR ("neuralgia"[MeSH Terms] OR "neuralgia"[All Fields] OR "neuralgias"[All Fields]) OR ("neuralgia"[MeSH Terms] OR "neuralgia"[All Fields] OR ("neuropathic"[All Fields] AND "pain"[All Fields]) OR "neuropathic pain"[All Fields]) OR ("neuralgia"[MeSH Terms] OR "neuralgia"[All Fields] OR ("neuropathic"[All Fields] AND "pains"[All Fields]) OR "neuropathic pains"[All Fields]) OR ("neuralgia"[MeSH Terms] OR "neuralgia"[All Fields] OR ("pain"[All Fields] AND "neuropathic"[All Fields]) OR "pain neuropathic"[All Fields]) OR ("neuralgia"[MeSH Terms] OR "neuralgia"[All Fields] OR ("pains"[All Fields] AND "neuropathic"[All Fields]) OR "pains neuropathic"[All Fields]) OR ("neuralgia"[MeSH Terms] OR "neuralgia"[All Fields] OR "neurodynia"[All Fields]) OR ("neuralgia"[MeSH Terms] OR "neuralgia"[All Fields]) OR ("neuralgia"[MeSH Terms] OR "neuralgia"[All Fields] OR ("neuralgia"[All Fields] AND "atypical"[All Fields]) OR "neuralgia atypical"[All Fields]) OR ("neuralgia"[MeSH Terms] OR "neuralgia"[All Fields] OR ("atypical"[All Fields] AND "neuralgia"[All Fields]) OR "atypical neuralgia"[All Fields]) OR ("neuralgia"[MeSH Terms] OR "neuralgia"[All Fields] OR ("atypical"[All Fields] AND "neuralgias"[All Fields]) OR "atypical neuralgias"[All Fields]) OR ("neuralgia"[MeSH Terms] OR "neuralgia"[All Fields] OR ("neuralgias"[All Fields] AND "atypical"[All Fields]) OR "neuralgias atypical"[All Fields]) OR ("neuralgia"[MeSH Terms] OR "neuralgia"[All Fields] OR ("neuralgia"[All Fields] AND "iliohypogastric"[All Fields] AND "nerve"[All Fields])) OR ("neuralgia"[MeSH Terms] OR "neuralgia"[All Fields] OR ("iliohypogastric"[All Fields] AND "nerve"[All Fields] AND "neuralgia"[All Fields])) OR ("neuralgia"[MeSH Terms] OR "neuralgia"[All Fields] OR ("iliohypogastric"[All Fields] AND "nerve"[All Fields] AND "neuralgias"[All Fields])) OR ("neuralgia"[MeSH Terms] OR "neuralgia"[All Fields] OR ("nerve"[All Fields] AND "neuralgia"[All Fields] AND "iliohypogastric"[All Fields])) OR ("neuralgia"[MeSH Terms] OR "neuralgia"[All Fields] OR ("nerve"[All Fields] AND "neuralgias"[All Fields] AND "iliohypogastric"[All Fields])) OR ("neuralgia"[MeSH Terms] OR "neuralgia"[All Fields] OR ("neuralgias"[All Fields] AND "iliohypogastric"[All Fields] AND "nerve"[All Fields])) OR ("neuralgia"[MeSH Terms] OR "neuralgia"[All Fields] OR ("paroxysmal"[All Fields] AND "nerve"[All Fields] AND "pain"[All Fields]) OR "paroxysmal nerve pain"[All Fields]) OR ("neuralgia"[MeSH Terms] OR "neuralgia"[All Fields] OR ("nerve"[All Fields] AND "pain"[All Fields] AND "paroxysmal"[All Fields])) OR ("neuralgia"[MeSH Terms] OR "neuralgia"[All Fields] OR ("nerve"[All Fields] AND "pains"[All Fields] AND "paroxysmal"[All Fields])) OR ("neuralgia"[MeSH Terms] OR "neuralgia"[All Fields] OR ("pain"[All Fields] AND "paroxysmal"[All Fields] AND "nerve"[All Fields])) OR ("neuralgia"[MeSH Terms] OR "neuralgia"[All Fields] OR ("pains"[All Fields] AND "paroxysmal"[All Fields] AND "nerve"[All Fields])) OR</p> |

("neuralgia"[MeSH Terms] OR "neuralgia"[All Fields] OR ("paroxysmal"[All Fields] AND "nerve"[All Fields] AND "pains"[All Fields])) OR  
 ("neuralgia"[MeSH Terms] OR "neuralgia"[All Fields] OR ("neuralgia"[All Fields] AND "perineal"[All Fields])) OR ("neuralgia"[MeSH Terms] OR  
 "neuralgia"[All Fields] OR ("neuralgias"[All Fields] AND "perineal"[All Fields])) OR ("neuralgia"[MeSH Terms] OR "neuralgia"[All Fields] OR  
 ("perineal"[All Fields] AND "neuralgia"[All Fields]) OR "perineal neuralgia"[All Fields]) OR ("neuralgia"[MeSH Terms] OR "neuralgia"[All Fields] OR ("perineal"[All Fields] AND "neuralgias"[All Fields]) OR "perineal neuralgias"[All Fields]) OR ("neuralgia"[MeSH Terms] OR "neuralgia"[All Fields] OR ("neuralgia"[All Fields] AND "stump"[All Fields])) OR  
 ("neuralgia"[MeSH Terms] OR "neuralgia"[All Fields] OR ("neuralgias"[All Fields] AND "stump"[All Fields])) OR ("neuralgia"[MeSH Terms] OR  
 "neuralgia"[All Fields] OR ("stump"[All Fields] AND "neuralgia"[All Fields])) OR ("neuralgia"[MeSH Terms] OR "neuralgia"[All Fields] OR ("stump"[All Fields] AND "neuralgias"[All Fields])) OR ("neuralgia"[MeSH Terms] OR  
 "neuralgia"[All Fields] OR ("neuralgia"[All Fields] AND "supraorbital"[All Fields]) OR "neuralgia supraorbital"[All Fields]) OR ("neuralgia"[MeSH Terms] OR "neuralgia"[All Fields] OR ("neuralgias"[All Fields] AND  
 "supraorbital"[All Fields])) OR ("neuralgia"[MeSH Terms] OR "neuralgia"[All Fields] OR ("supraorbital"[All Fields] AND "neuralgia"[All Fields]) OR  
 "supraorbital neuralgia"[All Fields]) OR ("neuralgia"[MeSH Terms] OR "neuralgia"[All Fields] OR ("supraorbital"[All Fields] AND "neuralgias"[All Fields])) OR ("neuralgia"[MeSH Terms] OR "neuralgia"[All Fields] OR  
 ("neuralgia"[All Fields] AND "vidian"[All Fields]) OR "neuralgia vidian"[All Fields]) OR ("neuralgia"[MeSH Terms] OR "neuralgia"[All Fields] OR  
 ("neuralgias"[All Fields] AND "vidian"[All Fields])) OR ("neuralgia"[MeSH Terms] OR "neuralgia"[All Fields] OR ("vidian"[All Fields] AND  
 "neuralgia"[All Fields])) OR ("neuralgia"[MeSH Terms] OR "neuralgia"[All Fields] OR ("vidian"[All Fields] AND "neuralgias"[All Fields])) OR  
 ("neuralgia"[MeSH Terms] OR "neuralgia"[All Fields] OR ("nerve"[All Fields] AND "pain"[All Fields]) OR "nerve pain"[All Fields]) OR ("neuralgia"[MeSH Terms] OR "neuralgia"[All Fields] OR ("nerve"[All Fields] AND "pains"[All Fields]) OR "nerve pains"[All Fields]) OR ("neuralgia"[MeSH Terms] OR  
 "neuralgia"[All Fields] OR ("pain"[All Fields] AND "nerve"[All Fields]) OR "pain nerve"[All Fields]) OR ("neuralgia"[MeSH Terms] OR "neuralgia"[All Fields] OR ("pains"[All Fields] AND "nerve"[All Fields])) OR  
 ("neuralgia"[MeSH Terms] OR "neuralgia"[All Fields] OR ("neuralgia"[All Fields] AND "ilioinguinal"[All Fields])) OR ("neuralgia"[MeSH Terms] OR "neuralgia"[All Fields] OR ("ilioinguinal"[All Fields] AND "neuralgia"[All Fields]) OR "ilioinguinal neuralgia"[All Fields]) OR ("neuralgia"[MeSH Terms] OR  
 "neuralgia"[All Fields] OR ("ilioinguinal"[All Fields] AND "neuralgias"[All Fields]) OR "ilioinguinal neuralgias"[All Fields]) OR ("neuralgia"[MeSH

|    |                                                                                                                                                                                                                                                                                                                                                                                                                                                                                                                                       |
|----|---------------------------------------------------------------------------------------------------------------------------------------------------------------------------------------------------------------------------------------------------------------------------------------------------------------------------------------------------------------------------------------------------------------------------------------------------------------------------------------------------------------------------------------|
|    | Terms] OR "neuralgia"[All Fields] OR ("neuralgias"[All Fields] AND "ilioinguinal"[All Fields]))                                                                                                                                                                                                                                                                                                                                                                                                                                       |
| #2 | "pulsed radiofrequency treatment"[MeSH Terms] OR "pulsed radiofrequency treatments"[All Fields] OR (("radiofrequencies"[All Fields] OR "Radiofrequency"[All Fields] OR "radiofrequent"[All Fields]) AND "treatment pulsed"[All Fields]) OR (("radiofrequencies"[All Fields] OR "Radiofrequency"[All Fields] OR "radiofrequent"[All Fields]) AND "treatments pulsed"[All Fields]) OR "treatment pulsed radiofrequency"[All Fields] OR "treatments pulsed radiofrequency"[All Fields] OR "pulsed radio frequency treatment"[All Fields] |
| #3 | (clinical[tiab] AND trial[tiab]) OR "clinical trials as topic"[mesh] OR "clinical trial"[pt] OR random*[tiab] OR "random allocation"[mesh] OR "therapeutic use"[sh]                                                                                                                                                                                                                                                                                                                                                                   |
| #4 | #1 AND #2 AND #3                                                                                                                                                                                                                                                                                                                                                                                                                                                                                                                      |

# BMJ Open

## Efficacy and safety of high-voltage pulsed radiofrequency ablation versus standard-voltage pulsed radiofrequency ablation for patients with neuropathic pain: protocol for a systematic review and meta-analysis

|                                 |                                                                                                                                                                                                                                                                                                                                                                                                                                                                                                                                                   |
|---------------------------------|---------------------------------------------------------------------------------------------------------------------------------------------------------------------------------------------------------------------------------------------------------------------------------------------------------------------------------------------------------------------------------------------------------------------------------------------------------------------------------------------------------------------------------------------------|
| Journal:                        | <i>BMJ Open</i>                                                                                                                                                                                                                                                                                                                                                                                                                                                                                                                                   |
| Manuscript ID                   | bmjopen-2022-063385.R1                                                                                                                                                                                                                                                                                                                                                                                                                                                                                                                            |
| Article Type:                   | Protocol                                                                                                                                                                                                                                                                                                                                                                                                                                                                                                                                          |
| Date Submitted by the Author:   | 24-May-2022                                                                                                                                                                                                                                                                                                                                                                                                                                                                                                                                       |
| Complete List of Authors:       | Jia, Yitong; Xuanwu Hospital Capital Medical University, Anesthesiology<br>wang, zheng; Xuanwu Hospital Capital Medical University, Department of General Surgery<br>Ma, Yanhui; Xuanwu Hospital Capital Medical University, Anesthesiology<br>Wang, Tengting; Xuanwu Hospital Capital Medical University, Thoracic Surgery<br>Feng, Kunpeng; Xuanwu Hospital Capital Medical University, Anesthesiology<br>Feng, Guang; Xuanwu Hospital Capital Medical University, Anesthesiology<br>Wang, Tianlong; Xuanwu Hospital Capital Medical University |
| <b>Primary Subject Heading</b>: | Anaesthesia                                                                                                                                                                                                                                                                                                                                                                                                                                                                                                                                       |
| Secondary Subject Heading:      | Neurology                                                                                                                                                                                                                                                                                                                                                                                                                                                                                                                                         |
| Keywords:                       | PAIN MANAGEMENT, Neurological pain < NEUROLOGY, Pain management < ANAESTHETICS                                                                                                                                                                                                                                                                                                                                                                                                                                                                    |
|                                 |                                                                                                                                                                                                                                                                                                                                                                                                                                                                                                                                                   |

SCHOLARONE™  
Manuscripts

1 **Efficacy and safety of high-voltage pulsed**  
2 **radiofrequency ablation versus standard-voltage**  
3 **pulsed radiofrequency ablation for patients with**  
4 **neuropathic pain: protocol for a systematic review and**  
5 **meta-analysis**

6 <sup>1,2</sup>Yitong Jia, <sup>3</sup>Zheng Wang, <sup>1,2</sup>Yanhui Ma, <sup>4</sup>Tengteng Wang, <sup>1,2</sup>Kunpeng Feng, <sup>1,2</sup>Guang  
7 Feng <sup>1,2</sup>Tianlong Wang

8  
9 <sup>1</sup>Department of Anesthesiology, Xuanwu Hospital, Capital Medical University, Beijing,  
10 China.

11 <sup>2</sup>Beijing Municipal Geriatric Medical Research Center, Beijing, China.

12 <sup>3</sup>Department of General Surgery, Xuanwu Hospital, Capital Medical University, Beijing,  
13 China.

14 <sup>4</sup>Department of Thoracic surgery, Xuanwu Hospital, Capital Medical University, Beijing,  
15 China.

16  
17 Correspondence to

18 Prof Tianlong Wang, Department of Anesthesiology, Xuanwu Hospital, Capital  
19 Medical University, Beijing, China; E-mail: [w\\_tl5595@hotmail.com](mailto:w_tl5595@hotmail.com).

20  
21 Yitong Jia, Zheng Wang and Yanhui Ma contributed equally to this paper.

22

23

24



1  
2  
3  
4  
5 25  
6  
78 **Abstract**  
9

10 **Introduction** Pulsed radiofrequency (PRF) ablation is commonly used for the treatment  
11 of neuropathic pain (NP). However, it is unclear whether increasing the output voltage of  
12 PRF can safely improve its efficacy. This study aims to compare the efficacy and safety  
13 of high-voltage PRF ablation and standard-voltage PRF ablation for the treatment of  
14 patients with NP.  
15  
16

17 **Methods and analysis** We will search PubMed/MEDLINE, EMBASE, Web of Science,  
18 the Cochrane Library, conference proceedings for relevant abstracts, clinical trials  
19 registers (ClinicalTrials.gov), and the World Health Organization's International Clinical  
20 Trial Registry Platform (WHO ICTRP) (from the date of inception until March 15, 2022).  
21 Only randomized controlled trials (RCTs) will be included. Two reviewers (YJ and GF)  
22 will independently perform study screening and selection, data extraction, risk of bias  
23 assessment, and quality of evidence assessment. The primary outcome of this meta-  
24 analysis will be the efficiency rate in patients with NP. The secondary outcomes will  
25 include numeric rating scale score, visual analog scale score, time to take effect, rescue  
26 drug dosage, quality of life using the health questionnaire (SF-36), and the incidence of  
27 adverse events. Meta-analyses will be conducted using standard meta-analysis software  
28 (RevMan V.5.3, The Nordic Cochrane Center, The Cochrane Collaboration, Copenhagen,  
29 Denmark).  
30  
31  
32  
33  
34  
35

36 **Ethics and dissemination** The requirement for ethical approval was waived as our  
37 systematic review will be based on published literature. The results of this study will be  
38 submitted to a peer-reviewed journal.  
39  
40  
41

42

43 **PROSPERO registration number** CRD42022297804.  
44  
45

46

47 **Strengths and limitations of this study**

48 To the best of our knowledge, this will be the first systematic review and meta-analysis  
49 to evaluate the efficacy and safety of high-voltage PRF ablation for the treatment of  
50 patients with NP. To provide unbiased information, only RCTs will be included.

51 The study findings will provide comprehensive information for future study designs in  
52 terms of interventional treatment of neuropathic pain.

53 The accuracy of our research conclusions might be subjected to language limitations as  
54 only studies published in English will be included.  
55  
56

57

58 **Key words:** high-voltage, pulsed radiofrequency, neuropathic pain, randomized  
59  
60

1  
2  
3  
4 63 controlled trials  
5  
6 64  
7  
8

## 9 65 **Introduction**

10  
11 66 Neuropathic pain (NP) is a common chronic pain condition caused by lesions or diseases  
12  
13  
14 67 affecting the somatosensory nervous system, including trigeminal neuralgia, peripheral  
15  
16  
17 68 nerve injury pain, painful polyneuropathy, post herpetic neuralgia, and central post stroke  
18  
19  
20 69 pain.<sup>1</sup> Epidemiological data have reported that the global prevalence of NP is  
21  
22 70 approximately 6.9% - 10%.<sup>2</sup> Neuropathic pain is a refractory pain syndrome with a long  
23  
24  
25 71 duration of occurrence, frequent recurrent attacks, and poor response to traditional  
26  
27  
28 72 analgesics. Most patients with NP suffer from ongoing or intermittent spontaneous pain  
29  
30  
31 73 accompanied by burning, pricking, and squeezing sensations, and have a poor quality of  
32  
33  
34 74 life (QoL).<sup>3</sup> Therefore, finding an effective treatment option for NP and improving  
35  
36 75 patients' QoL is of great importance.

37  
38 76 In recent years, pulsed radiofrequency (PRF) ablation, a new type of neuromodulation  
39  
40  
41 77 technique, has been successfully applied in the treatment of NP.<sup>4-9</sup> Different from  
42  
43  
44 78 continuous radiofrequency (CRF), which produces heat by friction and vibration, leading  
45  
46  
47 79 to thermocoagulation, denaturation, and necrosis of the target tissue<sup>10 11</sup>, PRF provides  
48  
49  
50 80 pulsed energy waves followed by a 480-ms heat dissipation interval, and the temperature  
51  
52  
53 81 does not exceed 42°C.<sup>12-14</sup> PRF treatment exerts its effect via the modulation of nerve  
54  
55  
56 82 function , which is a result of the electric field effect and not the impedance of pain  
57  
58  
59 83 signal transduction;<sup>15 16</sup> thus, PRF ablation is a nondestructive technique that can be  
60  
61  
62 84 repeatedly applied without causing nerve tissue damage.

1  
2  
3  
4  
5 85 The standard proposed PRF parameters are set as follows: an output voltage of 45 V,  
6  
7  
8 86 temperature of 42°C, pulse frequency of 2 Hz, output frequency of 500 kHz, continuous  
9  
10  
11 87 current action of 20 ms, and intermission period of 480 ms. Recently, scholars have  
12  
13 88 attempted to treat patients with NP using high-voltage PRF ablation. Teixeira and Sluijter  
14  
15 89 first reported that a high-voltage PRF ablation of 60 V used to treat patients with  
16  
17  
18 90 discogenic pain attained satisfactory efficacy that lasted over 3 months.<sup>17</sup> In 2013, Luo et  
19  
20  
21 91 al found that the postoperative numeric rating scale (NRS) score had a significant negative  
22  
23 92 correlation with the output voltage of PRF.<sup>18</sup> Afterwards, Luo et al compared the efficacy  
24  
25  
26 93 of high-voltage PRF with standard-voltage PRF for idiopathic trigeminal neuralgia (TN)  
27  
28  
29 94 patients who responded poorly to oral carbamazepine or nerve blockade by steroid, and  
30  
31 95 the results revealed the 1- year effective rate of high-voltage PRF (69%) was significantly  
32  
33  
34 96 higher than that in the standard-voltage PRF treatment(19%) (P = 0.000).<sup>19</sup> Additionally,  
35  
36  
37 97 they compared the efficacy of high voltage PRF and standard voltage PRF for refractory  
38  
39 98 neuralgia infraorbital nerve therapy, and reported that high voltage PRF ablation could  
40  
41  
42 99 achieve higher response rates at 1 month, 3 months, 6 months, and 1 year post-  
43  
44 100 procedure.<sup>20</sup> Jia et al retrospectively analyzed the medical data of patients with idiopathic  
45  
46  
47 101 TN undergoing PRF. The study found that for patients who did not respond to the first  
48  
49  
50 102 PRF treatment and underwent the second PRF treatment, a higher dose of out-put voltage  
51  
52 103 than the initial one could achieve improved analgesic effect<sup>21-23</sup>.  
53  
54  
55 104 However, the number of patients who experienced mild numbness postoperatively was  
56  
57 105 greater in the high-voltage group (27%) than in the standard-voltage group (13%).<sup>20</sup> In  
58  
59  
60

1  
2  
3  
4  
5 106 addition, a randomized controlled trial (RCT) conducted by Wan et al showed that the  
6  
7  
8 107 scores were significantly lower in the high-voltage group than in the standard-voltage  
9  
10  
11 108 group at 3 and 6 months; however, no significant difference was observed at 1 month  
12  
13 109 after treatment.<sup>24</sup> A study by Wan et al revealed that the incidence of ecchymoses in the  
14  
15 110 high-voltage group (19.2%) was higher than that in the standard-voltage group (12.1%).  
16  
17  
18 111 As a result, further analysis is required to determine whether the efficacy of high-voltage  
19  
20  
21 112 PRF ablation at different time points is superior to that of standard-voltage PRF ablation,  
22  
23 113 and whether high-voltage PRF ablation is a safe treatment method for NP.  
24  
25  
26 114 The primary objectives of this study will be to compare the efficacy and safety of high-  
27  
28  
29 115 voltage PRF ablation and standard-voltage PRF ablation for the treatment of NP at  
30  
31 116 different time points postoperatively through a systematic review and meta-analysis of  
32  
33  
34 117 RCTs.

118

## 119 **Methods**

120 This protocol was developed according to the reporting guidelines of Preferred Reporting  
121  
122 121 Items for Systematic Reviews and Meta-Analyses Protocols (PRISMA-P) statement<sup>25</sup>  
123  
124 122 **(checklist in Supplement 1)**. The protocol for this systematic review was registered in  
125  
126 123 the PROSPERO database (registration number: CRD42022297804). Our systematic  
127  
128  
129 124 review will be conducted in accordance with the recommendations of the Cochrane  
130  
131  
132 125 Handbook for Systematic Reviews of Interventions.<sup>26</sup> Any amendments made to this  
133  
134  
135 126 protocol and the whole review process will be updated in a timely manner on the

1  
2  
3  
4  
5 127 PROSPERO registration and the final manuscript.  
6  
7

8 128  
9

## 10 129 **Criteria for considering eligible studies**

### 11 12 13 130 **Types of studies**

14  
15 131 Only RCTs will be included. All studies must be published in English. Experimental  
16  
17  
18 132 animal studies will be excluded.  
19

20 133  
21

### 22 23 134 **Participants**

24  
25 135 Patients with NP conditions recognized and defined by the International Association for  
26  
27  
28 136 the Study of Pain (IASP)<sup>27</sup> will be included. Neuropathic pain is initiated or caused by a  
29  
30  
31 137 primary lesion or dysfunction of the nervous system. Studies regarding diabetic  
32  
33  
34 138 neuropathy, complex regional pain syndrome type I, low back pain without radicular pain,  
35  
36 139 and postsurgical pain will be excluded.  
37

38  
39 140  
40

### 41 141 **Interventions and Comparators**

42  
43  
44 142 We will examine trials investigating high-voltage PRF treatment for patients with NP.  
45  
46  
47 143 The high-voltage PRF treatment will be set to the manual pulse mode: the initial voltage  
48  
49  
50 144 will be 40 or 45 V, and the output voltage will then be gradually increased to the highest  
51  
52 145 voltage the patient can tolerate (temperature control below 50°C). The comparator will  
53  
54 146 be the standard PRF treatment.  
55

56  
57 147  
58  
59  
60

## 148 **Outcome measures**

149 The primary outcome of this meta-analysis is the efficiency rate in patients with NP. The  
150 predefined time points for the efficiency rate will be 1 month, 3 months, and 6 months  
151 after the procedure. Additionally, 1-year or 2-year time point will also be considered.  
152 Treatment efficiency recurrence is defined as a pain reduction of greater than 50% after  
153 treatment compared to pre-surgery. Secondary outcomes will include (NRS) or visual  
154 analog scale (VAS) score, time to take effect, rescue drug dosage, quality of life (QoL)  
155 determined using a health questionnaire (SF-36)<sup>28</sup> at 1 month, 3 months, and 6 months  
156 postoperatively, and incidence of adverse events (AEs).

## 158 **Information sources and search strategy**

159 A computer-based search strategy will be designed by an experienced librarian and  
160 revised by another expert librarian according to the Peer Review of Electronic Search  
161 Strategies checklist.<sup>29</sup> The primary source of literature will be the following major  
162 electronic databases: PubMed/MEDLINE, EMBASE, Web of Science, and the Cochrane  
163 Library (from the date of inception until March 15, 2022). The secondary source of  
164 potentially relevant research includes conference proceedings for relevant abstracts,  
165 clinical trials registers (ClinicalTrials.gov), and the World Health Organization's  
166 International Clinical Trial Registry Platform (WHO ICTRP) to identify ongoing studies.  
167 The search will encompass a broad range of terms and keywords related to "high-voltage,"  
168 "pulsed radiofrequency," "neuropathic pain," and "RCT". The detailed search strategy is

1  
2  
3  
4  
5 169 presented in **Supplement 2**.

6  
7 170

8  
9  
10 171 **Data selection and analysis**

11  
12  
13 172 **Study Selection**

14  
15 173 We will use the Population, Intervention, Comparison, Outcome (PICO) model<sup>30</sup>to

16  
17 174 determine the specific criteria for selecting studies. Two reviewers (YJ and GF) will

18  
19 175 independently screen and select the relevant studies. During the initial screening,

20  
21 176 reviewers will determine whether the study could be included by screening the titles and

22  
23 177 abstracts retrieved via database search. We will screen the full texts retained from the

24  
25 178 initial selection of articles to include studies that meet the eligibility criteria.

26  
27 179 Disagreements between the two reviewers will be resolved by a third reviewer (TW). If

28  
29 180 several studies present data from the same study population or multiple publications from

30  
31 181 the same study are published in chronological order, the study with the most direct

32  
33 182 interventions or the largest sample size will be selected. The same methods will be used

34  
35 183 for citation, reference screening, and selection, as well as for protocols registered in

36  
37 184 clinical trial registries.

38  
39 185

40  
41  
42 186 **Data extraction**

43  
44 187 A standardized electronic form for data extraction will be created by ZW. Two reviewers

45  
46 188 (YJ and GF) will independently extract the following data: study characteristics (e.g.,

47  
48 189 name of the first author, year of publication, type of study, sample size), population

1  
2  
3  
4  
5 190 characteristics (e.g., age, gender, disease duration, medical history, preoperative pain  
6  
7  
8 191 intensity, and follow-up period), and outcome data (e.g., primary and secondary outcomes  
9  
10 192 and any AEs caused by PRF treatment). Similarly, a third reviewer will be required to  
11  
12  
13 193 resolve any discrepancies. We will attempt to contact the study authors by email or post  
14  
15 194 for further information in case of any ambiguity or insufficient information. Table 1  
16  
17  
18 195 presents the characteristics of the studies that will be included.  
19  
20  
21 196

### 197 **Assessment of risk of bias and quality of evidence assessment**

25 198 Two reviewers (YJ and GF) will independently assess the risk of bias (RoB) and a third  
26  
27  
28 199 reviewer (ZW) will resolve discrepancies. The RoB of RCTs will be assessed according  
29  
30  
31 200 to items in the Cochrane Collaboration's tool.<sup>26</sup>  
32  
33  
34 201 We will evaluate the overall quality of the body of evidence in accordance with the  
35  
36 202 Grading of Recommendations Assessment, Development, and Evaluation (GRADE)  
37  
38  
39 203 methodology,<sup>31</sup> which examines study design, RoB, inconsistency, indirectness, and  
40  
41 204 imprecision. Accordingly, quality of evidence will be rated as high, moderate, low, or  
42  
43  
44 205 very low.  
45  
46  
47 206

### 207 **Data synthesis and analysis**

51 208 Meta-analyses will be conducted using the standard meta-analysis software (RevMan  
52  
53  
54 209 V.5.3, The Nordic Cochrane Center, The Cochrane Collaboration, Copenhagen,  
55  
56  
57 210 Denmark). We will compute standardized mean differences (SMDs) and 95% confidence  
58  
59  
60



1  
2  
3  
4  
5 211 intervals (CIs) for continuous outcomes, and risk ratios (RR) with 95% CI for binary  
6  
7  
8 212 outcomes. A two-tailed p-value < 0.05 will be considered statistically significant. We will  
9  
10 213 assess the intervention effects between high-voltage PRF and standard-voltage PRF using  
11  
12  
13 214 pre- to post-intervention changes. When the data in the literature are expressed as median  
14  
15 215 values and quartiles, we will use mathematical operations to transform them into mean  
16  
17  
18 216 and standard deviation (SD).<sup>32 33</sup> Additionally, we will use forest plots to visualize pooled  
19  
20  
21 217 estimates and the extent of heterogeneity among studies. Heterogeneity will be assessed  
22  
23 218 using the I<sup>2</sup> statistic. I<sup>2</sup> > 50% is an indication of substantial heterogeneity, and in such  
24  
25  
26 219 cases the random-effects model will be used to analyze the outcomes; otherwise, a fixed-  
27  
28  
29 220 effect model will be applied. If heterogeneity is observed, we will perform subgroup  
30  
31 221 analysis according to prespecified variables, such as study design, intervention  
32  
33 222 characteristics, or RoB. The sources of heterogeneity will be explored using sensitivity  
34  
35  
36 223 analysis. A funnel plot<sup>34</sup> or Egger test<sup>35</sup> will be used to assess publication bias.  
37  
38  
39 224

## 40 41 225 **Patient and Public Involvement**

42  
43  
44 226 Since our study is a systematic review based on published literature, no patients will be  
45  
46  
47 227 involved.  
48

49 228

## 50 51 52 53 229 **Discussion**

54  
55  
56  
57 230 Our study aims to compare the efficacy and safety of high-voltage PRF ablation and  
58  
59  
60

1  
2  
3  
4  
5 231 standard-voltage PRF ablation for NP therapy and provide clinical evidence for the  
6  
7  
8 232 selection of PRF modes in clinical practice via synthesizing RCTs in journal publications.  
9  
10 233 This study has some limitations. The sample size of the eligible RCTs might not be large  
11  
12  
13 234 and the accuracy of our research conclusions might be biased due to language limitations,  
14  
15 235 as we will only include studies published in English. Overall, the study findings will  
16  
17  
18 236 provide comprehensive information for future study designs in terms of interventional  
19  
20  
21 237 treatment of NP.

22  
23  
24  
25  
26 238

## 27 **Abbreviations**

28 240 PRF, Pulsed radiofrequency; NP, neuropathic pain; RCTs, randomized controlled trials;  
29  
30  
31 241 NRS, numeric rating scale; VAS, visual analog scale; QoL, quality of life; AEs, adverse  
32  
33  
34 242 events; RoB, risk of bias; GRADE, Grading of Recommendations Assessment,  
35  
36 243 Development, and Evaluation; SMDs, standardized mean differences; CIs, confidence  
37  
38  
39 244 intervals; RR, risk ratios.

## 40 **Ethics and dissemination**

41 245 Ethical approval was waived as our systematic review will be based on published  
42  
43  
44 246 literature. The results of this study will be submitted to a peer-reviewed journal.  
45  
46  
47 247

48 248  
49 249 **Acknowledgments** The authors would like to thank the participants of the study for their cooperation.  
50  
51 250

52 251 **Contributors** YJ, ZW, TW and TW made substantial contributions to clinical study design; YJ, YM  
53  
54 252 and GF made substantial contributions to manuscript preparation, editing and review; KF made  
55  
56 253 contributions to English language editing; YM, KF and GF consulted about clinical issues; YJ, YM,  
57  
58 254 TW and TW have given final approval of the version to be published. YJ, ZW and YM contributed  
59  
60 255 equally to this work. TW is responsible as corresponding author.  
256

1  
2  
3  
4  
5 257 **Funding** This study was funded and sponsored by Beijing Municipal Medical Science Institute-Public  
6  
7 258 Welfare Development Reform Pilot Project (Capital Medical Research No. 2019-2).  
8  
9

10 259

11  
12  
13 260 **Consent for publication** All authors consented.  
14

15 261

16  
17  
18 262 **Conflicts of interest** None.  
19

20 263

## 21 264 **References**

- 22  
23  
24  
25  
26 265 1. Baron R, Binder A, Wasner G. Neuropathic pain: diagnosis, pathophysiological mechanisms,  
27  
28 266 and treatment. *The Lancet Neurology* 2010;9(8):807-19. doi: 10.1016/s1474-  
29  
30 267 4422(10)70143-5 [published Online First: 2010/07/24]  
31  
32  
33 268 2. van Hecke O, Austin SK, Khan RA, et al. Neuropathic pain in the general population: a  
34  
35 269 systematic review of epidemiological studies. *Pain* 2014;155(4):654-62. doi:  
36  
37 270 10.1016/j.pain.2013.11.013 [published Online First: 2013/12/03]  
38  
39  
40  
41 271 3. Colloca L, Ludman T, Bouhassira D, et al. Neuropathic pain. *Nature reviews Disease primers*  
42  
43 272 2017;3:17002. doi: 10.1038/nrdp.2017.2 [published Online First: 2017/02/17]  
44  
45  
46 273 4. Park CH, Lee SH, Lee PB. Intradiscal Pulsed Radiofrequency Application Duration Effect on  
47  
48 274 Lumbar Discogenic Low Back Pain. *Pain physician* 2020;23(5):E535-e40. [published  
49  
50 275 Online First: 2020/09/25]  
51  
52  
53 276 5. Martin DC, Willis ML, Mullinax LA, et al. Pulsed radiofrequency application in the treatment of  
54  
55 277 chronic pain. *Pain practice : the official journal of World Institute of Pain* 2007;7(1):31-5.  
56  
57  
58  
59  
60

- 1  
2  
3  
4  
5 278 doi: 10.1111/j.1533-2500.2007.00107.x [published Online First: 2007/02/20]  
6  
7  
8 279 6. Kim K, Jo D, Kim E. Pulsed Radiofrequency to the Dorsal Root Ganglion in Acute Herpes  
9  
10 280 Zoster and Postherpetic Neuralgia. *Pain physician* 2017;20(3):E411-e18. [published  
11  
12  
13 281 Online First: 2017/03/25]  
14  
15 282 7. Shi Y, Wu W. Treatment of Neuropathic Pain Using Pulsed Radiofrequency: A Meta-analysis.  
16  
17  
18 283 *Pain physician* 2016;19(7):429-44. [published Online First: 2016/09/28]  
19  
20 284 8. Jia Y, Shrestha N, Wang X, et al. The Long-Term Outcome of CT-Guided Pulsed  
21  
22  
23 285 Radiofrequency in the Treatment of Idiopathic Glossopharyngeal Neuralgia: A  
24  
25  
26 286 Retrospective Multi-Center Case Series. *Journal of pain research* 2020;13:2093-102. doi:  
27  
28 287 10.2147/jpr.S259994 [published Online First: 2020/09/10]  
29  
30  
31 288 9. Vuka I, Marciuš T, Došenović S, et al. Efficacy and Safety of Pulsed Radiofrequency as a  
32  
33  
34 289 Method of Dorsal Root Ganglia Stimulation in Patients with Neuropathic Pain: A  
35  
36 290 Systematic Review. *Pain medicine (Malden, Mass)* 2020;21(12):3320-43. doi:  
37  
38 291 10.1093/pm/pnaa141 [published Online First: 2020/06/04]  
39  
40  
41 292 10. Ren H, Zhao C, Wang X, et al. The Efficacy and Safety of the Application of Pulsed  
42  
43  
44 293 Radiofrequency, Combined With Low-Temperature Continuous Radiofrequency, to the  
45  
46  
47 294 Gasserian Ganglion for the Treatment of Primary Trigeminal Neuralgia: Study Protocol  
48  
49 295 for a Prospective, Open-Label, Paralle. *Pain physician* 2021;24(1):89-97. [published  
50  
51 296 Online First: 2021/01/06]  
52  
53  
54 297 11. Contreras Lopez WO, Navarro PA, Vargas MD, et al. Pulsed Radiofrequency Versus  
55  
56  
57 298 Continuous Radiofrequency for Facet Joint Low Back Pain: A Systematic Review. *World*  
58  
59  
60

- 1  
2  
3  
4  
5 299 *neurosurgery* 2019;122:390-96. doi: 10.1016/j.wneu.2018.10.191 [published Online First:  
6  
7  
8 300 2018/11/08]  
9  
10 301 12. Wu CY, Lin HC, Chen SF, et al. Efficacy of Pulsed Radiofrequency in Herpetic Neuralgia: A  
11  
12 302 Meta-Analysis of Randomized Controlled Trials. *The Clinical journal of pain*  
13  
14 303 2020;36(11):887-95. doi: 10.1097/ajp.0000000000000867 [published Online First:  
15  
16 304 2020/07/24]  
17  
18  
19  
20 305 13. Wu H, Zhou J, Chen J, et al. Therapeutic efficacy and safety of radiofrequency ablation for  
21  
22 306 the treatment of trigeminal neuralgia: a systematic review and meta-analysis. *Journal of*  
23  
24 307 *pain research* 2019;12:423-41. doi: 10.2147/jpr.S176960 [published Online First:  
25  
26 308 2019/01/31]  
27  
28  
29  
30 309 14. Li H, Ding Y, Zhu Y, et al. Effective Treatment of Postherpetic Neuralgia at the First Branch  
31  
32 310 of the Trigeminal Nerve by High-Voltage Pulsed Radiofrequency. *Frontiers in neurology*  
33  
34 311 2021;12:746035. doi: 10.3389/fneur.2021.746035 [published Online First: 2021/10/29]  
35  
36  
37  
38 312 15. Sam J, Catapano M, Sahni S, et al. Pulsed Radiofrequency in Interventional Pain  
39  
40 313 Management: Cellular and Molecular Mechanisms of Action - An Update and Review.  
41  
42 314 *Pain physician* 2021;24(8):525-32. [published Online First: 2021/11/19]  
43  
44  
45  
46 315 16. Vanneste T, Van Lantschoot A, Van Boxem K, et al. Pulsed radiofrequency in chronic pain.  
47  
48 316 *Current opinion in anaesthesiology* 2017;30(5):577-82. doi:  
49  
50 317 10.1097/aco.0000000000000502 [published Online First: 2017/07/13]  
51  
52  
53  
54 318 17. Teixeira A, Sluijter ME. Intradiscal high-voltage, long-duration pulsed radiofrequency for  
55  
56 319 discogenic pain: a preliminary report. *Pain medicine (Malden, Mass)* 2006;7(5):424-8. doi:

- 1  
2  
3  
4  
5 320 10.1111/j.1526-4637.2006.00138.x [published Online First: 2006/10/04]  
6  
7  
8 321 18. Luo F, Meng L, Wang T, et al. Pulsed radiofrequency treatment for idiopathic trigeminal  
9  
10 322 neuralgia: a retrospective analysis of the causes for ineffective pain relief. *European*  
11  
12  
13 323 *journal of pain (London, England)* 2013;17(8):1189-92. doi: 10.1002/j.1532-  
14  
15 324 2149.2012.00278.x [published Online First: 2013/01/17]  
16  
17  
18 325 19. Fang L, Tao W, Jingjing L, et al. Comparison of High-voltage- with Standard-voltage Pulsed  
19  
20 326 Radiofrequency of Gasserian Ganglion in the Treatment of Idiopathic Trigeminal  
21  
22  
23 327 Neuralgia. *Pain practice : the official journal of World Institute of Pain* 2015;15(7):595-  
24  
25  
26 328 603. doi: 10.1111/papr.12227 [published Online First: 2014/06/24]  
27  
28  
29 329 20. Luo F, Wang T, Shen Y, et al. High Voltage Pulsed Radiofrequency for the Treatment of  
30  
31 330 Refractory Neuralgia of the Infraorbital Nerve: A Prospective Double-Blinded  
32  
33  
34 331 Randomized Controlled Study. *Pain physician* 2017;20(4):271-79. [published Online First:  
35  
36 332 2017/05/24]  
37  
38  
39 333 21. Fang L, Jia Z. In Response to Comments on "Long-term Follow-up of Pulsed Radiofrequency  
40  
41 334 Treatment for Trigeminal Neuralgia: Kaplan-Meier Analysis in a Consecutive Series of  
42  
43  
44 335 149 Patients". *Pain physician* 2022;25(2):E409. [published Online First: 2022/03/25]  
45  
46  
47 336 22. Silva V. Comments on "Long-term Follow-up of Pulsed Radiofrequency Treatment for  
48  
49 337 Trigeminal Neuralgia: Kaplan-Meier Analysis in a Consecutive Series of 149 Patients".  
50  
51  
52 338 *Pain physician* 2022;25(2):E408. [published Online First: 2022/03/25]  
53  
54  
55 339 23. Zipu J, Hao R, Chunmei Z, et al. Long-term Follow-up of Pulsed Radiofrequency Treatment  
56  
57 340 for Trigeminal Neuralgia: Kaplan-Meier Analysis in a Consecutive Series of 149 Patients.  
58  
59  
60

- 1  
2  
3  
4  
5 341 *Pain physician* 2021;24(8):E1263-e71. [published Online First: 2021/11/19]  
6  
7  
8 342 24. Wan CF, Song T. Comparison of Two Different Pulsed Radiofrequency Modes for Prevention  
9  
10 343 of Postherpetic Neuralgia in Elderly Patients with Acute/Subacute Trigeminal Herpes  
11  
12 344 Zoster. *Neuromodulation : journal of the International Neuromodulation Society* 2021 doi:  
13  
14 345 10.1111/ner.13457 [published Online First: 2021/05/20]  
15  
16  
17  
18 346 25. Preferred reporting items for systematic review and meta-analysis protocols (PRISMA-P)  
19  
20 347 2015: elaboration and explanation. *BMJ (Clinical research ed)* 2016;354:i4086. doi:  
21  
22 348 10.1136/bmj.i4086 [published Online First: 2016/07/23]  
23  
24  
25  
26 349 26. Cumpston M, Li T, Page MJ, et al. Updated guidance for trusted systematic reviews: a new  
27  
28 350 edition of the Cochrane Handbook for Systematic Reviews of Interventions. *The*  
29  
30 351 *Cochrane database of systematic reviews* 2019;10:Ed000142. doi:  
31  
32 352 10.1002/14651858.Ed000142 [published Online First: 2019/10/24]  
33  
34  
35  
36 353 27. Ochoa JL. Neuropathic pain: redefinition and a grading system for clinical and research  
37  
38 354 purposes. *Neurology* 2009;72(14):1282-3. doi: 10.1212/01.wnl.0000346325.50431.5f  
39  
40 355 [published Online First: 2009/04/08]  
41  
42  
43  
44 356 28. Brazier JE, Harper R, Jones NM, et al. Validating the SF-36 health survey questionnaire: new  
45  
46 357 outcome measure for primary care. *BMJ (Clinical research ed)* 1992;305(6846):160-4.  
47  
48 358 doi: 10.1136/bmj.305.6846.160 [published Online First: 1992/07/18]  
49  
50  
51  
52 359 29. McGowan J, Sampson M, Salzwedel DM, et al. PRESS Peer Review of Electronic Search  
53  
54 360 Strategies: 2015 Guideline Statement. *Journal of clinical epidemiology* 2016;75:40-6. doi:  
55  
56 361 10.1016/j.jclinepi.2016.01.021 [published Online First: 2016/03/24]  
57  
58  
59  
60

- 1  
2  
3  
4  
5 362 30. Huang X, Lin J, Demner-Fushman D. Evaluation of PICO as a knowledge representation for  
6  
7  
8 363 clinical questions. *AMIA Annual Symposium proceedings AMIA Symposium*  
9  
10 364 2006;2006:359-63. [published Online First: 2007/01/24]  
11  
12  
13 365 31. Guyatt G, Oxman AD, Akl EA, et al. GRADE guidelines: 1. Introduction-GRADE evidence  
14  
15 366 profiles and summary of findings tables. *Journal of clinical epidemiology* 2011;64(4):383-  
16  
17  
18 367 94. doi: 10.1016/j.jclinepi.2010.04.026 [published Online First: 2011/01/05]  
19  
20  
21 368 32. Wan X, Wang W, Liu J, et al. Estimating the sample mean and standard deviation from the  
22  
23 369 sample size, median, range and/or interquartile range. *BMC Med Res Methodol*  
24  
25  
26 370 2014;14:135. doi: 10.1186/1471-2288-14-135 [published Online First: 20141219]  
27  
28  
29 371 33. Shi J, Luo D, Wan X, et al. Detecting the skewness of data from the sample size and the five-  
30  
31 372 number summary. 2020  
32  
33  
34 373 34. Egger M, Davey Smith G, Schneider M, et al. Bias in meta-analysis detected by a simple,  
35  
36 374 graphical test. *BMJ (Clinical research ed)* 1997;315(7109):629-34. doi:  
37  
38  
39 375 10.1136/bmj.315.7109.629 [published Online First: 1997/10/06]  
40  
41  
42 376 35. Sterne JA, Sutton AJ, Ioannidis JP, et al. Recommendations for examining and interpreting  
43  
44 377 funnel plot asymmetry in meta-analyses of randomised controlled trials. *BMJ (Clinical*  
45  
46 378 *research ed)* 2011;343:d4002. doi: 10.1136/bmj.d4002 [published Online First:  
47  
48  
49 379 2011/07/26]  
50  
51  
52 380  
53  
54 381  
55  
56  
57 382  
58  
59  
60



383 Table 1 Main characteristics of RCTs comparing the efficacy and safety of high-voltage PRF and standard-voltage PRF for the treatment of NP

| Study ID | Sample size | Types of neuropathic pain | Setting | Duration | Number of female (%) / male (%) patients | Age (years) | Preoperative pain (VAS/ NRS) | Preoperative QoL | Postoperative pain (VAS/ NRS) | Postoperative QoL | Complications |
|----------|-------------|---------------------------|---------|----------|------------------------------------------|-------------|------------------------------|------------------|-------------------------------|-------------------|---------------|
| A        |             |                           |         |          |                                          |             |                              |                  |                               |                   |               |
| B        |             |                           |         |          |                                          |             |                              |                  |                               |                   |               |
| C        |             |                           |         |          |                                          |             |                              |                  |                               |                   |               |
| .....    |             |                           |         |          |                                          |             |                              |                  |                               |                   |               |

384 Abbreviations: RCT, randomized controlled trials; VAS: visual analog scale; NRS: numeric rating scale; QoL: quality of life.

385

**Supplement 1.** PRISMA-P (Preferred Reporting Items for Systematic review and Meta-Analysis Protocols) 2015 checklist: recommended items to address in a systematic review protocol\*

| Section and topic                 | Item No | Checklist item                                                                                                                                                                                  | Page No |
|-----------------------------------|---------|-------------------------------------------------------------------------------------------------------------------------------------------------------------------------------------------------|---------|
| <b>ADMINISTRATIVE INFORMATION</b> |         |                                                                                                                                                                                                 |         |
| Title:                            |         |                                                                                                                                                                                                 |         |
| Identification                    | 1a      | Identify the report as a protocol of a systematic review                                                                                                                                        | 1       |
| Update                            | 1b      | If the protocol is for an update of a previous systematic review, identify as such                                                                                                              | n/a     |
| Registration                      | 2       | If registered, provide the name of the registry (such as PROSPERO) and registration number                                                                                                      | 2       |
| Authors:                          |         |                                                                                                                                                                                                 |         |
| Contact                           | 3a      | Provide name, institutional affiliation, e-mail address of all protocol authors; provide physical mailing address of corresponding author                                                       | 1       |
| Contributions                     | 3b      | Describe contributions of protocol authors and identify the guarantor of the review                                                                                                             | 11      |
| Amendments                        | 4       | If the protocol represents an amendment of a previously completed or published protocol, identify as such and list changes; otherwise, state plan for documenting important protocol amendments | n/a     |
| Support:                          |         |                                                                                                                                                                                                 |         |
| Sources                           | 5a      | Indicate sources of financial or other support for the review                                                                                                                                   | 11      |
| Sponsor                           | 5b      | Provide name for the review funder and/or sponsor                                                                                                                                               | 11      |
| Role of sponsor or funder         | 5c      | Describe roles of funder(s), sponsor(s), and/or institution(s), if any, in developing the protocol                                                                                              | 11      |

---

**INTRODUCTION**


---

|            |   |                                                                                                                                                          |     |
|------------|---|----------------------------------------------------------------------------------------------------------------------------------------------------------|-----|
| Rationale  | 6 | Describe the rationale for the review in the context of what is already known                                                                            | 3   |
| Objectives | 7 | Provide an explicit statement of the question(s) the review will address with reference to participants, interventions, comparators, and outcomes (PICO) | 3-4 |

---

**METHODS**


---

|                      |    |                                                                                                                                                                                                                               |     |
|----------------------|----|-------------------------------------------------------------------------------------------------------------------------------------------------------------------------------------------------------------------------------|-----|
| Eligibility criteria | 8  | Specify the study characteristics (such as PICO, study design, setting, time frame) and report characteristics (such as years considered, language, publication status) to be used as criteria for eligibility for the review | 5   |
| Information sources  | 9  | Describe all intended information sources (such as electronic databases, contact with study authors, trial registers or other grey literature sources) with planned dates of coverage                                         | 6-7 |
| Search strategy      | 10 | Present draft of search strategy to be used for at least one electronic database, including planned limits, such that it could be repeated                                                                                    | 6-7 |

---

## Study records:

|                             |     |                                                                                                                                                                                                 |   |
|-----------------------------|-----|-------------------------------------------------------------------------------------------------------------------------------------------------------------------------------------------------|---|
| Data management             | 11a | Describe the mechanism(s) that will be used to manage records and data throughout the review                                                                                                    | 7 |
| Selection process           | 11b | State the process that will be used for selecting studies (such as two independent reviewers) through each phase of the review (that is, screening, eligibility and inclusion in meta-analysis) | 7 |
| Data collection process     | 11c | Describe planned method of extracting data from reports (such as piloting forms, done independently, in duplicate), any processes for obtaining and confirming data from investigators          | 7 |
| Data items                  | 12  | List and define all variables for which data will be sought (such as PICO items, funding sources), any pre-planned data assumptions and simplifications                                         | 9 |
| Outcomes and prioritization | 13  | List and define all outcomes for which data will be sought, including prioritization of main and additional outcomes, with rationale                                                            | 6 |

---

|                                    |     |                                                                                                                                                                                                                                                  |   |
|------------------------------------|-----|--------------------------------------------------------------------------------------------------------------------------------------------------------------------------------------------------------------------------------------------------|---|
| Risk of bias in individual studies | 14  | Describe anticipated methods for assessing risk of bias of individual studies, including whether this will be done at the outcome or study level, or both; state how this information will be used in data synthesis                             | 8 |
| Data synthesis                     | 15a | Describe criteria under which study data will be quantitatively synthesized                                                                                                                                                                      | 9 |
|                                    | 15b | If data are appropriate for quantitative synthesis, describe planned summary measures, methods of handling data and methods of combining data from studies, including any planned exploration of consistency (such as $I^2$ , Kendall's $\tau$ ) | 9 |
|                                    | 15c | Describe any proposed additional analyses (such as sensitivity or subgroup analyses, meta-regression)                                                                                                                                            | 9 |
|                                    | 15d | If quantitative synthesis is not appropriate, describe the type of summary planned                                                                                                                                                               | 9 |
| Meta-bias(es)                      | 16  | Specify any planned assessment of meta-bias(es) (such as publication bias across studies, selective reporting within studies)                                                                                                                    | 8 |
| Confidence in cumulative evidence  | 17  | Describe how the strength of the body of evidence will be assessed (such as GRADE)                                                                                                                                                               | 8 |

**\* It is strongly recommended that this checklist be read in conjunction with the PRISMA-P Explanation and Elaboration (cite when available) for important clarification on the items. Amendments to a review protocol should be tracked and dated. The copyright for PRISMA-P (including checklist) is held by the PRISMA-P Group and is distributed under a Creative Commons Attribution Licence 4.0.**

*From: Shamseer L, Moher D, Clarke M, Ghersi D, Liberati A, Petticrew M, Shekelle P, Stewart L, PRISMA-P Group. Preferred reporting items for systematic review and meta-analysis protocols (PRISMA-P) 2015: elaboration and explanation. BMJ. 2015 Jan 2;349(jan02 1):g7647.*

| Search step | Search terms                                                                                                                                                                                                                                                                                                                                                                                                                                                                                                                                                                                                                                                                                                                                                                                                                                                                                                                                                                                                                                                                                                                                                                                                                                                                                                                                                                                                                                                                                                                                                                                                                                                                                                                                                                                                                                                                                                                                                                                                                                                                                                                                                                                                                                                                                                                                                                                                                                                                                                                                                                                                                                                                                                                                                                                                                                                                                                                                                                                                                                                                                                             |
|-------------|--------------------------------------------------------------------------------------------------------------------------------------------------------------------------------------------------------------------------------------------------------------------------------------------------------------------------------------------------------------------------------------------------------------------------------------------------------------------------------------------------------------------------------------------------------------------------------------------------------------------------------------------------------------------------------------------------------------------------------------------------------------------------------------------------------------------------------------------------------------------------------------------------------------------------------------------------------------------------------------------------------------------------------------------------------------------------------------------------------------------------------------------------------------------------------------------------------------------------------------------------------------------------------------------------------------------------------------------------------------------------------------------------------------------------------------------------------------------------------------------------------------------------------------------------------------------------------------------------------------------------------------------------------------------------------------------------------------------------------------------------------------------------------------------------------------------------------------------------------------------------------------------------------------------------------------------------------------------------------------------------------------------------------------------------------------------------------------------------------------------------------------------------------------------------------------------------------------------------------------------------------------------------------------------------------------------------------------------------------------------------------------------------------------------------------------------------------------------------------------------------------------------------------------------------------------------------------------------------------------------------------------------------------------------------------------------------------------------------------------------------------------------------------------------------------------------------------------------------------------------------------------------------------------------------------------------------------------------------------------------------------------------------------------------------------------------------------------------------------------------------|
| #1          | <p>"neuralgia"[MeSH Terms] OR ("neuralgia"[MeSH Terms] OR "neuralgia"[All Fields] OR "neuralgias"[All Fields]) OR ("neuralgia"[MeSH Terms] OR "neuralgia"[All Fields] OR ("neuropathic"[All Fields] AND "pain"[All Fields]) OR "neuropathic pain"[All Fields]) OR ("neuralgia"[MeSH Terms] OR "neuralgia"[All Fields] OR ("neuropathic"[All Fields] AND "pains"[All Fields]) OR "neuropathic pains"[All Fields]) OR ("neuralgia"[MeSH Terms] OR "neuralgia"[All Fields] OR ("pain"[All Fields] AND "neuropathic"[All Fields]) OR "pain neuropathic"[All Fields]) OR ("neuralgia"[MeSH Terms] OR "neuralgia"[All Fields] OR ("pains"[All Fields] AND "neuropathic"[All Fields]) OR "pains neuropathic"[All Fields]) OR ("neuralgia"[MeSH Terms] OR "neuralgia"[All Fields] OR "neurodynia"[All Fields]) OR ("neuralgia"[MeSH Terms] OR "neuralgia"[All Fields]) OR ("neuralgia"[MeSH Terms] OR "neuralgia"[All Fields] OR ("neuralgia"[All Fields] AND "atypical"[All Fields]) OR "neuralgia atypical"[All Fields]) OR ("neuralgia"[MeSH Terms] OR "neuralgia"[All Fields] OR ("atypical"[All Fields] AND "neuralgia"[All Fields]) OR "atypical neuralgia"[All Fields]) OR ("neuralgia"[MeSH Terms] OR "neuralgia"[All Fields] OR ("atypical"[All Fields] AND "neuralgias"[All Fields]) OR "atypical neuralgias"[All Fields]) OR ("neuralgia"[MeSH Terms] OR "neuralgia"[All Fields] OR ("neuralgias"[All Fields] AND "atypical"[All Fields]) OR "neuralgias atypical"[All Fields]) OR ("neuralgia"[MeSH Terms] OR "neuralgia"[All Fields] OR ("neuralgia"[All Fields] AND "iliohypogastric"[All Fields] AND "nerve"[All Fields])) OR ("neuralgia"[MeSH Terms] OR "neuralgia"[All Fields] OR ("iliohypogastric"[All Fields] AND "nerve"[All Fields] AND "neuralgia"[All Fields])) OR ("neuralgia"[MeSH Terms] OR "neuralgia"[All Fields] OR ("iliohypogastric"[All Fields] AND "nerve"[All Fields] AND "neuralgias"[All Fields])) OR ("neuralgia"[MeSH Terms] OR "neuralgia"[All Fields] OR ("nerve"[All Fields] AND "neuralgia"[All Fields] AND "iliohypogastric"[All Fields])) OR ("neuralgia"[MeSH Terms] OR "neuralgia"[All Fields] OR ("nerve"[All Fields] AND "neuralgias"[All Fields] AND "iliohypogastric"[All Fields])) OR ("neuralgia"[MeSH Terms] OR "neuralgia"[All Fields] OR ("neuralgias"[All Fields] AND "iliohypogastric"[All Fields] AND "nerve"[All Fields])) OR ("neuralgia"[MeSH Terms] OR "neuralgia"[All Fields] OR ("paroxysmal"[All Fields] AND "nerve"[All Fields] AND "pain"[All Fields]) OR "paroxysmal nerve pain"[All Fields]) OR ("neuralgia"[MeSH Terms] OR "neuralgia"[All Fields] OR ("nerve"[All Fields] AND "pain"[All Fields] AND "paroxysmal"[All Fields])) OR ("neuralgia"[MeSH Terms] OR "neuralgia"[All Fields] OR ("nerve"[All Fields] AND "pains"[All Fields] AND "paroxysmal"[All Fields])) OR ("neuralgia"[MeSH Terms] OR "neuralgia"[All Fields] OR ("pain"[All Fields] AND "paroxysmal"[All Fields] AND "nerve"[All Fields])) OR ("neuralgia"[MeSH Terms] OR "neuralgia"[All Fields] OR ("pains"[All Fields] AND "paroxysmal"[All Fields] AND "nerve"[All Fields])) OR</p> |

("neuralgia"[MeSH Terms] OR "neuralgia"[All Fields] OR ("paroxysmal"[All Fields] AND "nerve"[All Fields] AND "pains"[All Fields])) OR  
 ("neuralgia"[MeSH Terms] OR "neuralgia"[All Fields] OR ("neuralgia"[All Fields] AND "perineal"[All Fields])) OR ("neuralgia"[MeSH Terms] OR  
 "neuralgia"[All Fields] OR ("neuralgias"[All Fields] AND "perineal"[All Fields])) OR ("neuralgia"[MeSH Terms] OR "neuralgia"[All Fields] OR  
 ("perineal"[All Fields] AND "neuralgia"[All Fields]) OR "perineal neuralgia"[All Fields]) OR ("neuralgia"[MeSH Terms] OR "neuralgia"[All Fields] OR ("perineal"[All Fields] AND "neuralgias"[All Fields]) OR "perineal neuralgias"[All Fields]) OR ("neuralgia"[MeSH Terms] OR "neuralgia"[All Fields] OR ("neuralgia"[All Fields] AND "stump"[All Fields])) OR  
 ("neuralgia"[MeSH Terms] OR "neuralgia"[All Fields] OR ("neuralgias"[All Fields] AND "stump"[All Fields])) OR ("neuralgia"[MeSH Terms] OR  
 "neuralgia"[All Fields] OR ("stump"[All Fields] AND "neuralgia"[All Fields])) OR ("neuralgia"[MeSH Terms] OR "neuralgia"[All Fields] OR ("stump"[All Fields] AND "neuralgias"[All Fields])) OR ("neuralgia"[MeSH Terms] OR  
 "neuralgia"[All Fields] OR ("neuralgia"[All Fields] AND "supraorbital"[All Fields]) OR "neuralgia supraorbital"[All Fields]) OR ("neuralgia"[MeSH Terms] OR "neuralgia"[All Fields] OR ("neuralgias"[All Fields] AND  
 "supraorbital"[All Fields])) OR ("neuralgia"[MeSH Terms] OR "neuralgia"[All Fields] OR ("supraorbital"[All Fields] AND "neuralgia"[All Fields]) OR  
 "supraorbital neuralgia"[All Fields]) OR ("neuralgia"[MeSH Terms] OR "neuralgia"[All Fields] OR ("supraorbital"[All Fields] AND "neuralgias"[All Fields])) OR ("neuralgia"[MeSH Terms] OR "neuralgia"[All Fields] OR  
 ("neuralgia"[All Fields] AND "vidian"[All Fields]) OR "neuralgia vidian"[All Fields]) OR ("neuralgia"[MeSH Terms] OR "neuralgia"[All Fields] OR  
 ("neuralgias"[All Fields] AND "vidian"[All Fields])) OR ("neuralgia"[MeSH Terms] OR "neuralgia"[All Fields] OR ("vidian"[All Fields] AND  
 "neuralgia"[All Fields])) OR ("neuralgia"[MeSH Terms] OR "neuralgia"[All Fields] OR ("vidian"[All Fields] AND "neuralgias"[All Fields])) OR  
 ("neuralgia"[MeSH Terms] OR "neuralgia"[All Fields] OR ("nerve"[All Fields] AND "pain"[All Fields]) OR "nerve pain"[All Fields]) OR ("neuralgia"[MeSH Terms] OR "neuralgia"[All Fields] OR ("nerve"[All Fields] AND "pains"[All Fields]) OR "nerve pains"[All Fields]) OR ("neuralgia"[MeSH Terms] OR  
 "neuralgia"[All Fields] OR ("pain"[All Fields] AND "nerve"[All Fields]) OR "pain nerve"[All Fields]) OR ("neuralgia"[MeSH Terms] OR "neuralgia"[All Fields] OR ("pains"[All Fields] AND "nerve"[All Fields])) OR  
 ("neuralgia"[MeSH Terms] OR "neuralgia"[All Fields] OR ("neuralgia"[All Fields] AND "ilioinguinal"[All Fields])) OR ("neuralgia"[MeSH Terms] OR "neuralgia"[All Fields] OR ("ilioinguinal"[All Fields] AND "neuralgia"[All Fields]) OR "ilioinguinal neuralgia"[All Fields]) OR ("neuralgia"[MeSH Terms] OR  
 "neuralgia"[All Fields] OR ("ilioinguinal"[All Fields] AND "neuralgias"[All Fields]) OR "ilioinguinal neuralgias"[All Fields]) OR ("neuralgia"[MeSH

|    |                                                                                                                                                                                                                                                                                                                                                                                                                                                                                                                                       |
|----|---------------------------------------------------------------------------------------------------------------------------------------------------------------------------------------------------------------------------------------------------------------------------------------------------------------------------------------------------------------------------------------------------------------------------------------------------------------------------------------------------------------------------------------|
|    | Terms] OR "neuralgia"[All Fields] OR ("neuralgias"[All Fields] AND "ilioinguinal"[All Fields]))                                                                                                                                                                                                                                                                                                                                                                                                                                       |
| #2 | "pulsed radiofrequency treatment"[MeSH Terms] OR "pulsed radiofrequency treatments"[All Fields] OR (("radiofrequencies"[All Fields] OR "Radiofrequency"[All Fields] OR "radiofrequent"[All Fields]) AND "treatment pulsed"[All Fields]) OR (("radiofrequencies"[All Fields] OR "Radiofrequency"[All Fields] OR "radiofrequent"[All Fields]) AND "treatments pulsed"[All Fields]) OR "treatment pulsed radiofrequency"[All Fields] OR "treatments pulsed radiofrequency"[All Fields] OR "pulsed radio frequency treatment"[All Fields] |
| #3 | (clinical[tiab] AND trial[tiab]) OR "clinical trials as topic"[mesh] OR "clinical trial"[pt] OR random*[tiab] OR "random allocation"[mesh] OR "therapeutic use"[sh]                                                                                                                                                                                                                                                                                                                                                                   |
| #4 | #1 AND #2 AND #3                                                                                                                                                                                                                                                                                                                                                                                                                                                                                                                      |
