# Supplementary material for: Efficacy and safety of high-voltage versus standard-voltage pulsed radiofrequency ablation for patients with neuropathic pain: protocol for a systematic review and meta-analysis
Source: PubMed Central journal article supplement — BMJ Open. 2022 Jul 8;12(7):e063385. doi: 10.1136/bmjopen-2022-063385 (PMC9272125; doi:10.1136/bmjopen-2022-063385), 2022-07-08
Supplement: bmjopen-2022-063385supp002.pdf [file bmjopen-2022-063385supp002.pdf]

| Search step | Search terms                                                                                                                                                                                                                                                                                                                                                                                                                                                                                                                                                                                                                                                                                                                                                                                                                                                                                                                                                                                                                                                                                                                                                                                                                                                                                                                                                                                                                                                                                                                                                                                                                                                                                                                                                                                                                                                                                                                                                                                                                                                                                                                                                                                                                                                                                                                                                                                                                                                                                                                                                                                                                                                                                                                                                                                                                                                                                                                                                         |
|-------------|----------------------------------------------------------------------------------------------------------------------------------------------------------------------------------------------------------------------------------------------------------------------------------------------------------------------------------------------------------------------------------------------------------------------------------------------------------------------------------------------------------------------------------------------------------------------------------------------------------------------------------------------------------------------------------------------------------------------------------------------------------------------------------------------------------------------------------------------------------------------------------------------------------------------------------------------------------------------------------------------------------------------------------------------------------------------------------------------------------------------------------------------------------------------------------------------------------------------------------------------------------------------------------------------------------------------------------------------------------------------------------------------------------------------------------------------------------------------------------------------------------------------------------------------------------------------------------------------------------------------------------------------------------------------------------------------------------------------------------------------------------------------------------------------------------------------------------------------------------------------------------------------------------------------------------------------------------------------------------------------------------------------------------------------------------------------------------------------------------------------------------------------------------------------------------------------------------------------------------------------------------------------------------------------------------------------------------------------------------------------------------------------------------------------------------------------------------------------------------------------------------------------------------------------------------------------------------------------------------------------------------------------------------------------------------------------------------------------------------------------------------------------------------------------------------------------------------------------------------------------------------------------------------------------------------------------------------------------|
| #1          | <p>"neuralgia"[MeSH Terms] OR ("neuralgia"[MeSH Terms] OR "neuralgia"[All Fields] OR "neuralgias"[All Fields]) OR ("neuralgia"[MeSH Terms] OR "neuralgia"[All Fields] OR ("neuropathic"[All Fields] AND "pain"[All Fields]) OR "neuropathic pain"[All Fields]) OR ("neuralgia"[MeSH Terms] OR "neuralgia"[All Fields] OR ("neuropathic"[All Fields] AND "pains"[All Fields]) OR "neuropathic pains"[All Fields]) OR ("neuralgia"[MeSH Terms] OR "neuralgia"[All Fields] OR ("pain"[All Fields] AND "neuropathic"[All Fields]) OR "pain neuropathic"[All Fields]) OR ("neuralgia"[MeSH Terms] OR "neuralgia"[All Fields] OR ("pains"[All Fields] AND "neuropathic"[All Fields]) OR "pains neuropathic"[All Fields]) OR ("neuralgia"[MeSH Terms] OR "neuralgia"[All Fields] OR "neurodynia"[All Fields]) OR ("neuralgia"[MeSH Terms] OR "neuralgia"[All Fields] OR ("neuralgia"[All Fields] AND "atypical"[All Fields]) OR "neuralgia atypical"[All Fields]) OR ("neuralgia"[MeSH Terms] OR "neuralgia"[All Fields] OR ("atypical"[All Fields] AND "neuralgia"[All Fields]) OR "atypical neuralgia"[All Fields]) OR ("neuralgia"[MeSH Terms] OR "neuralgia"[All Fields] OR ("atypical"[All Fields] AND "neuralgias"[All Fields]) OR "atypical neuralgias"[All Fields]) OR ("neuralgia"[MeSH Terms] OR "neuralgia"[All Fields] OR ("neuralgias"[All Fields] AND "atypical"[All Fields]) OR "neuralgias atypical"[All Fields]) OR ("neuralgia"[MeSH Terms] OR "neuralgia"[All Fields] OR ("neuralgia"[All Fields] AND "iliohypogastric"[All Fields] AND "nerve"[All Fields])) OR ("neuralgia"[MeSH Terms] OR "neuralgia"[All Fields] OR ("iliohypogastric"[All Fields] AND "nerve"[All Fields] AND "neuralgia"[All Fields])) OR ("neuralgia"[MeSH Terms] OR "neuralgia"[All Fields] OR ("iliohypogastric"[All Fields] AND "nerve"[All Fields] AND "neuralgias"[All Fields])) OR ("neuralgia"[MeSH Terms] OR "neuralgia"[All Fields] OR ("nerve"[All Fields] AND "neuralgia"[All Fields] AND "iliohypogastric"[All Fields])) OR ("neuralgia"[MeSH Terms] OR "neuralgia"[All Fields] OR ("nerve"[All Fields] AND "neuralgias"[All Fields] AND "iliohypogastric"[All Fields])) OR ("neuralgia"[MeSH Terms] OR "neuralgia"[All Fields] OR ("nerve"[All Fields] AND "neuralgia"[All Fields] OR ("paroxysmal"[All Fields] AND "nerve"[All Fields] AND "pain"[All Fields]) OR "paroxysmal nerve pain"[All Fields]) OR ("neuralgia"[MeSH Terms] OR "neuralgia"[All Fields] OR ("nerve"[All Fields] AND "pain"[All Fields] AND "paroxysmal"[All Fields])) OR ("neuralgia"[MeSH Terms] OR "neuralgia"[All Fields] OR ("nerve"[All Fields] AND "pains"[All Fields] AND "paroxysmal"[All Fields])) OR ("neuralgia"[MeSH Terms] OR "neuralgia"[All Fields] OR ("pain"[All Fields] AND "paroxysmal"[All Fields] AND "nerve"[All Fields])) OR ("neuralgia"[MeSH Terms] OR "neuralgia"[All Fields] OR ("pains"[All Fields] AND "paroxysmal"[All Fields] AND "nerve"[All Fields])) OR</p> |

("neuralgia"[MeSH Terms] OR "neuralgia"[All Fields] OR ("paroxysmal"[All Fields] AND "nerve"[All Fields] AND "pains"[All Fields])) OR ("neuralgia"[MeSH Terms] OR "neuralgia"[All Fields] OR ("neuralgia"[All Fields] AND "perineal"[All Fields])) OR ("neuralgia"[MeSH Terms] OR "neuralgia"[All Fields] OR ("neuralgias"[All Fields] AND "perineal"[All Fields])) OR ("neuralgia"[MeSH Terms] OR "neuralgia"[All Fields] OR ("perineal"[All Fields] AND "neuralgia"[All Fields]) OR "perineal neuralgia"[All Fields]) OR ("neuralgia"[MeSH Terms] OR "neuralgia"[All Fields] OR ("perineal"[All Fields] AND "neuralgias"[All Fields]) OR "perineal neuralgias"[All Fields]) OR ("neuralgia"[MeSH Terms] OR "neuralgia"[All Fields] OR ("neuralgia"[All Fields] AND "stump"[All Fields])) OR ("neuralgia"[MeSH Terms] OR "neuralgia"[All Fields] OR ("neuralgias"[All Fields] AND "stump"[All Fields])) OR ("neuralgia"[MeSH Terms] OR "neuralgia"[All Fields] OR ("stump"[All Fields] AND "neuralgia"[All Fields])) OR ("neuralgia"[MeSH Terms] OR "neuralgia"[All Fields] OR ("stump"[All Fields] AND "neuralgias"[All Fields])) OR ("neuralgia"[MeSH Terms] OR "neuralgia"[All Fields] OR ("neuralgia"[All Fields] AND "supraorbital"[All Fields]) OR "neuralgia supraorbital"[All Fields]) OR ("neuralgia"[MeSH Terms] OR "neuralgia"[All Fields] OR ("neuralgias"[All Fields] AND "supraorbital"[All Fields])) OR ("neuralgia"[MeSH Terms] OR "neuralgia"[All Fields] OR ("supraorbital"[All Fields] AND "neuralgia"[All Fields]) OR "supraorbital neuralgia"[All Fields]) OR ("neuralgia"[MeSH Terms] OR "neuralgia"[All Fields] OR ("supraorbital"[All Fields] AND "neuralgias"[All Fields])) OR ("neuralgia"[MeSH Terms] OR "neuralgia"[All Fields] OR ("neuralgia"[All Fields] AND "vidian"[All Fields]) OR "neuralgia vidian"[All Fields]) OR ("neuralgia"[MeSH Terms] OR "neuralgia"[All Fields] OR ("neuralgias"[All Fields] AND "vidian"[All Fields])) OR ("neuralgia"[MeSH Terms] OR "neuralgia"[All Fields] OR ("vidian"[All Fields] AND "neuralgia"[All Fields])) OR ("neuralgia"[MeSH Terms] OR "neuralgia"[All Fields] OR ("vidian"[All Fields] AND "neuralgias"[All Fields])) OR ("neuralgia"[MeSH Terms] OR "neuralgia"[All Fields] OR ("nerve"[All Fields] AND "pain"[All Fields]) OR "nerve pain"[All Fields]) OR ("neuralgia"[MeSH Terms] OR "neuralgia"[All Fields] OR ("nerve"[All Fields] AND "pains"[All Fields]) OR "nerve pains"[All Fields]) OR ("neuralgia"[MeSH Terms] OR "neuralgia"[All Fields] OR ("pain"[All Fields] AND "nerve"[All Fields]) OR "pain nerve"[All Fields]) OR ("neuralgia"[MeSH Terms] OR "neuralgia"[All Fields] OR ("pains"[All Fields] AND "nerve"[All Fields])) OR ("neuralgia"[MeSH Terms] OR "neuralgia"[All Fields] OR ("neuralgia"[All Fields] AND "ilioinguinal"[All Fields])) OR ("neuralgia"[MeSH Terms] OR "neuralgia"[All Fields] OR ("ilioinguinal"[All Fields] AND "neuralgia"[All Fields]) OR "ilioinguinal neuralgia"[All Fields]) OR ("neuralgia"[MeSH Terms] OR "neuralgia"[All Fields] OR ("ilioinguinal"[All Fields] AND "neuralgias"[All Fields]) OR "ilioinguinal neuralgias"[All Fields]) OR ("neuralgia"[MeSH

|    |                                                                                                                                                                                                                                                                                                                                                                                                                                                                                                                                       |
|----|---------------------------------------------------------------------------------------------------------------------------------------------------------------------------------------------------------------------------------------------------------------------------------------------------------------------------------------------------------------------------------------------------------------------------------------------------------------------------------------------------------------------------------------|
|    | Terms] OR "neuralgia"[All Fields] OR ("neuralgias"[All Fields] AND "ilioinguinal"[All Fields]))                                                                                                                                                                                                                                                                                                                                                                                                                                       |
| #2 | "pulsed radiofrequency treatment"[MeSH Terms] OR "pulsed radiofrequency treatments"[All Fields] OR (("radiofrequencies"[All Fields] OR "Radiofrequency"[All Fields] OR "radiofrequent"[All Fields]) AND "treatment pulsed"[All Fields]) OR (("radiofrequencies"[All Fields] OR "Radiofrequency"[All Fields] OR "radiofrequent"[All Fields]) AND "treatments pulsed"[All Fields]) OR "treatment pulsed radiofrequency"[All Fields] OR "treatments pulsed radiofrequency"[All Fields] OR "pulsed radio frequency treatment"[All Fields] |
| #3 | (clinical[tiab] AND trial[tiab]) OR "clinical trials as topic"[mesh] OR "clinical trial"[pt] OR random*[tiab] OR "random allocation"[mesh] OR "therapeutic use"[sh]                                                                                                                                                                                                                                                                                                                                                                   |
| #4 | #1 AND #2 AND #3                                                                                                                                                                                                                                                                                                                                                                                                                                                                                                                      |
